# Supplementary material for: The Globin Gene Repertoire of Lampreys: Convergent Evolution of Hemoglobin and Myoglobin in Jawed and Jawless Vertebrates
Source: Oxford University Press journal article supplement (doi:10.1093/molbev/msu216), 2014-07-23
Supplement: msu216_Supplementary_Data.zip [file msu216_Supplementary_Data.zip]

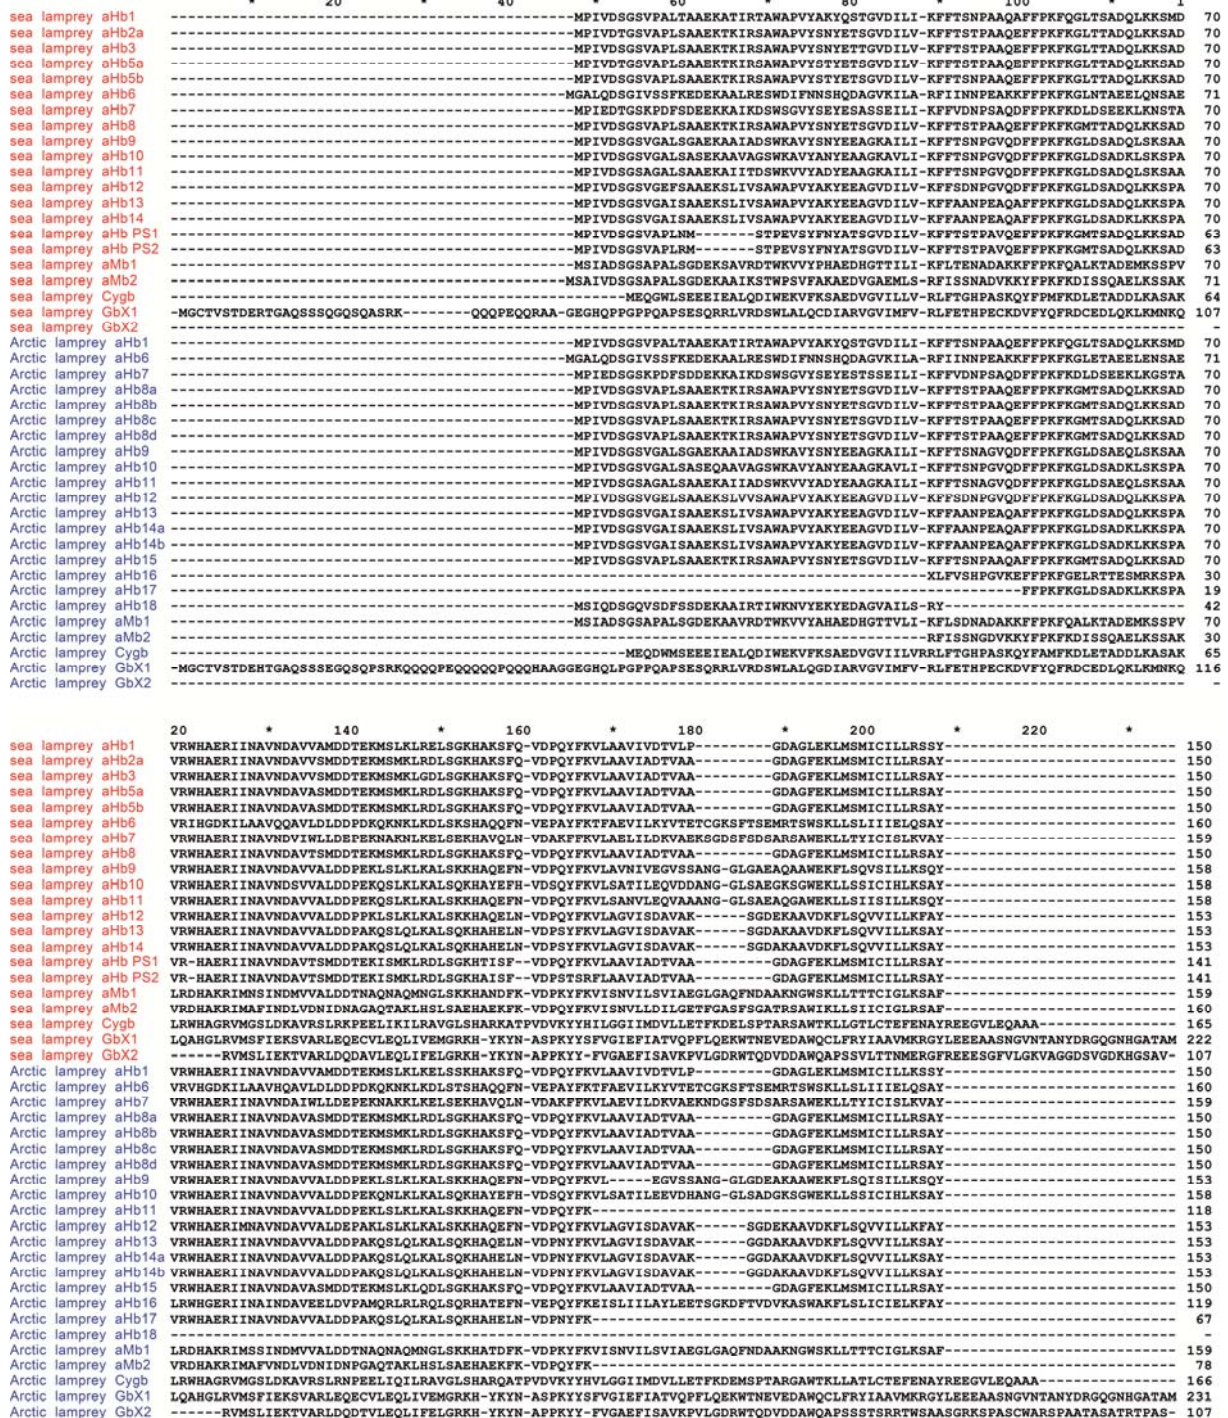

**Supplementary Figure S1.** Amino acid alignment of all sea lamprey and Arctic lamprey globin sequences, including the partial sequences.

```

>anole_lizard_GbY
-----
MTDLDRRHIREIWTAAAFENPEENGRLVIRFFSDYPASKQYF---
KTVPTDGDLDKAHPQVAFHGRRIMVAFSQVIENMENWNQACVLLERLVNNHKNIHQ-V-PSGMFQLLFQAMLCTFDDLLGRT-
FTP-EKRVSWEKFFQVIQEEVEAAAYDR-----
>Arctic_lamprey_aHb1
-----MPIVD-----
SGSVPALTAAEKATIRTAWAPVYAKYQSTGVDILIKFFTSNPAAQEFFPKFQGLTSADQLKKSM DVRWHAERI INAVNDAVVA
MDDTEKMSLKLKELSSKHAKSFQ-V-DPQYFKVLA AVIVDTVL-----PGDAGLEKLMSMICILLKSSY-----
-----
>Arctic_lamprey_aHb10
-----MPIVD-----
SGSVGALSASEQA AVAGSWKAVYANYEAAGKAVLIKFFTSNPGVQDFFPKFKGLDSADKLKSPAVRWHAERI INAVNDAVVA
LDDPEKQNLKLKALSQKHAYEFH-V-DSQYFKVLSATILEEVDHANG-G-LSA-DGKSGWEKLLSSICIHLSAY-----
-----
>Arctic_lamprey_aHb12
-----MPIVD-----
SGSVGELSAAEKSLVVS AWAPVYAKYEEAGVDILVKFFSDNPGVQDFFPKFKGLDSADQLKKSPAVRWHAERIMNAVND AVVA
LDEPAKLSLKLKALS KKHAEFN-V-DPQYFKVLAGVISDAVAK-----SG-DEKAAVDKFLSQVVILLKFAY-----
-----
>Arctic_lamprey_aHb13
-----MPIVD-----
SGSVGAISAAEKSLIVSAWAPVYAKYEEAGVDILVKFFAANPEAQAFFPKFKGLDSADQLKKSPAVRWHAERI INAVNDAVVA
LDDPAKQSLQLKALSQKHAQELN-V-DPNYFKVLAGVISDAVAK-----GG-DAKAAVDKFLSQVVILLKSAY-----
-----
>Arctic_lamprey_aHb14a
-----MPIVD-----
SGSVGAISAAEKSLIVSAWAPVYAKYEEAGVDILVKFFAANPEAQAFFPKFKGLDSADKLKSPAVRWHAERI INAVNDAVVA
LDDPAKQSLQLKALSQKHAHELN-V-DPNYFKVLAGVISDAVAK-----GG-DAKAAVDKFLSQVVILLKSAY-----
-----
>Arctic_lamprey_aHb15
-----MPIVD-----
SGSVAPLSAAEKT KIRSAWAPVYSNYETSGVDILVKFFTSNPAAQAFFPKFKGMTSADQLKKSA D VRWHAERI INAVNDAVAS
MDDTEKMSLKLQDLSGKHAKSFQ-V-DPQYFKVLA AVIADTV A-----AGDAGFEKLMSMICILLRSAY-----
-----
>Arctic_lamprey_aHb2a
-----MPIVD-----
SGSVAPLSAAEKT KIRSAWAPVYSNYETSGVDILVKFFTSTPAAQEFFPKFKGMTSADQLKKSA D VRWHAERI INAVNDAVAS
MDDTEKMSMKLRDL SGKHAKSFQ-V-DPQYFKVLA AVIADTV A-----AGDAGFEKLMSMICILLRSAY-----
-----
>Arctic_lamprey_aHb6
M-----GALQD-----
SGIVSSFKEDEKAALRESWDIFNNSHQDAGVKILARFI INNPEAKKFFPKFKGLETAEELENSAEVRVHGDKILA AVHQAVLD
LDDPDKQKNKLKDLSTSHAQQFN-V-EPAYFKTFAEVLKYVTETCGKS-FTS-EMRTSWSKLLSLIIIELQSAY-----
-----
>Arctic_lamprey_aHb7
-----MPIED-----
SGSKPDFSDDEKKA KDSWSGVYSEYESTSSEILIKFFVDNPSAQDFFPKFKDL DSEEKLKGSTAVRWHAERI INAVND AIWL
LDEPEKNAKKLKELSEKHAVQLN-V-DAKFFKVLA EVLDKVAEKNDGS-FSD-SARSAWEKLLTYICISLKVAY-----
-----
>Arctic_lamprey_aHb9
-----MPIVD-----
SGSVGALSGAEKAAIADSWKAVYSNYEEAGKAILIKFFTSNAGVQDFFPKFKGLDSAEQLSKSA A VRWHAERI INAVNDAVVA
LDDPEKLSLKLKALS KKHAEFN-V-DPQYFKVL-----EGVSSANG-G-LGD-EAKAAWEKFLSQISILLKSQY-----
-----
>Arctic_lamprey_aMb1
-----MSIAD-----
SGSAPALSGDEKAAVRDTWKVVYAHAEDHGTTVLIKFLSDNADAKKFFPKFQALKTADEM KSSPVL RDHAKRIMSSINDMVVA
LDDTNAQNAQMNGLSKKHATDFK-V-DPKYFKVISNVILSVIAEGLGAQ-FND-AAKNGWSKLLTTTCIGLKSAF-----
-----
>Arctic_lamprey_Cygb
ME-----
QDWMSEEEIEALQDIWEKVFKSAEDGVII LVR LFTGHPASKQYFAMFKDLETADDLKASAKLRWHAGRVMGSLDKAVRSLRN
PEELIQILRAVGLSHARQATPV-DVKYYHVLGGIIMDV LLETFKDE-MSP-
TARGAWTKLLATLCTEFENAYREEGVLEQAAA-----
>Arctic_lamprey_GbX1
MGCTVSTDEHTGAQSS-----
SEGQSQPSRKQQQQQPEQQQQQPQQQHAAGGEGHQLPGPPQAPSESQRRLV RDSWLALQGD IARVGVIMFVRLFETHPECKDVF
YQFRDCEDLQKLKMNKQLQAHGLRVMSFIEKSVARLEQECVLEQLIVEMGRKH-YKYN-A-
SPKYYSFVGIEFIATVQPFLQEK-WTN-EVEDAWQCLFRYIAAVMKRGYLEEEAASNGVNTANYDRGQGNHGATAM----

```

```

>Atlantic_hagfish_aHb1
-----MPITD-----
QRPLPTLSEGEKKAIKESWPIYQNFEQTSLDVLIEFLQKFPEAQDSFPKFSAKKC--
HLEQDNEVKWQASRIINAVNAVVGHL DNEVAMKQYLKELSVKHSSEFQ-V-DPKMFKELSAIFVSTI-----
RGKAAYEKLFISIICTLRSTYDE-----
>Atlantic_hagfish_aHb2
-----MS-----
AHGIARTTEGERAAVRASWAVLMKDYEHAGVQILDKFFKANPAAKPFFTKMKDLHTLEDLASSADARWHVERIIQAVNFAVIN
IEDREKLSNKFVKLSQDHIEEFH-VTDPQYFMILSQTILDEVEKRN-GG-LSG-EGKSGWHKVMTIICKMLKSKY-----
-----
>Atlantic_hagfish_aHb3
-----MPITD-----
HGQPPTLSEGDKKAIRESWPIYKNFEQNSLAVLLEFLKKFPAQDSFPKFSAKKS--
HLEQDPAVKLQAEVIINAVNHTIGLMDKEAAMKKYLKDLSTKHSTEFQ-V-NPDMFKELSAVVFVSTM-----
GGKAAYEKLFISIATLLRSTYDA-----
>Atlantic_hagfish_aHb4
-----MPITD-----
QGPLPTLSEGDKKAIRESWPIYQNFEQTGLVVLLEFLQKNPGAQQSFPKFSATKC--
NLEQDNEVKWQASRIINAVNHTIGLMDKEAAMKQYLKELSAKHSSEFQ-V-DPKLFKELSAIFVSTI-----
RGKAAYEKLFISIICTLRSTYDE-----
>Australian_lamprey_aHb1
-----MPIVD-----
SGSVSPLSDAEKNKIRAAWDLVYKDYECTGVDILVKFFGTGTPAAQAFPPKFKGLTTADDLKQSSDVRWHAERIINAVNDAVKS
MDDTEKMSMKLKELSIKHAQSFY-V-DRQYFKVLAGIIADTTA-----PGDAGFEKLMISMICILLSSAY-----
-----
>Australian_lamprey_aHb2
-----MPIVD-----
SGSVSPLSDAEKNKIRAAWDIVYKNYEKNGVDILVKFFGTGTPAAQAFPPKFKGLTTADALKKSSDVRWHAERIINAVNDAVKS
MDDTEKMSMKLQELSVKHAQSFY-V-DRQYFKVLAGIIADTTA-----PGDAGFEKLMISMICILLSSAY-----
-----
>Australian_lamprey_aHb3
-----MPIVD-----
SGSVSPLTAADKTKILAAWDLVYKNYEKNSVDILVKFFGTGTPAAQAFPPKFKGLTTADDLKSSDVRWHAERIINAVNDAVKS
MDDTEKMSMKLKELSNKHVKNFN-V-DRKYFKVLAGVIADTTA-----PGDASFEKLMISIIICILLNSAY-----
-----
>Australian_clawed_frog_GbY
-----
MADLTAADIENINEIWCKIYANPEESGKTVVIRLFTTYPQTKVYFKNLKNIATLEEMQVNP GIRAHGKRVMGALNQVIQNLND
WEVSSALTHLAQRHQDVHK-V-GVNNFQLLFLVILTIKFKEALGAD-FTP-EHCKSWEKLFISITYNFLDSCYTKSDS-----
-----
>Australian_clawed_frog_HbA1
-----
TLTDSKAAVIALWGKIAPQANAIGAEALERLFLSYPTKTYFSHF-DLSH-----GSADLANHGGKVVNALGEAAKHIND--
-LDAALSTLSDLHAYNLR-V-DPGNFKLLSHTIQVTLAIHFHKE-FDA-ATQAAWDKFLAEVATVLT SKYR-----
-----
>Australian_clawed_frog_HbAT5
-----
MTFSSAEKAAIASLWGKVS GHTDEIGAEALERLFLSYPTKTYFSHF-DLSH-----GSKDLRSHGGKVVKAI GNAATHIDD-
--IPHALSALSDLHAFKLK-V-DPGNFKLLSHAIQVTLAIHFPAE-FNA-DAQAAWDKFLAVVSAVLVSKYR-----
-----
>channel_catfish_GbX
MGCAISGL-----GLAPK-----NTTEAASEDD-----
APHLTSEHIAMIKESWKVIQEDIKVGII VFVRLFETHPECKDVFFLFRDVEDLERLRTSKELRAHGLRVMSFIEKSVARLDQ
LERLDSLAVELGRSH-YRYY-A-PPKYGYVGTEFICAVRPILKEK-WTP-
ELEKAWKTLFQYVTWLMRRGYNEEEEEAKRNN TVGSSRERPRQRNTAL----
>chicken_Cygb
ME-----KVQGEMEIER----
WERSEEISDAEKKVIQETWSRVYANCEDVGVSILIRFFVNFPSAKQYFSQFKHMDDTLEMERSLQLRKHAQRVMGAIN TVVEN
LDDPEKVSSVLALVGKAHALKHK-V-EPVYFKKLTGVMLEVIAEAYGND-FTP-
EAHGAWTKMRTLIIYTHVTAAYKEAGWVSYP SATL-----
>chicken_GbE
-----
MSFSEAEVQSARGAWKMYVDAEDNGTAVLVRMFTEHPDTSYFTHFGMDSAEEMKQSDQVRGHGKRVFTAINDMVQHLDNT
EAFGLILNPLGQKHATQLK-I-DPKNFRIICDIILQLMEEFKFG-----DCKASFVKVTNEICTHLTNIYKEAGW-----
-----
>chicken_HbA
-----
MVLSAADKNNVKGIFTKIAGHAE EYGAETLERMFTTYPPTKTYFPHF-DLSH-----GSAQIKGHGKKVVAALIEAANHIDD-
--IAGTSLSKLSDLHAKHLR-V-DPVNFKLLGQCFVLVVAIHHPPAA-LTP-EVHASLDKFLCAVGTVLTAKYR-----
-----

```

```

>chicken_HbAD
-----
MMLTAEDKKLIQQAWEKAASHQEEFGAEALTRMFTTYPQTKTYFPHF-DLSP-----GSDQVRGHGKKVLGALGNAVKNVDN-
--LSQAMAELSNLHAYNLR-V-DPVNFKLLSQCIQVVLAVHMGKD-YTP-EVHAADFDFLSAVSAVLAEKYR-----
-----
>chicken_HbG
-----MVHWTAEKQLITGLWGKV--
NVAECGAEALARLLIVYPWTQRFFASFGNLSSPTAILGNPMVRAHGKKVLSFGDAVKNLDN---IKNTFSQLSELHCDKLH-
V-DPENFRLLDILIIVLAHFHFKD-FTP-ECQAAWQKLVRVVAHALARKYH-----
>chicken_Mb
-----
MGLSDQEWQOVLTIWGKVEADIAGHGHEVLMRFLDHPETLDRFDKFKGLKTPDQMKGSEDLKKHGATVLTQLGKILKQKGN-
--HESELKPLAQTHATKHK-I-PVKYLEFISEVVIKIVIAEKHAAD-FGA-DSQAAMKKALELFRNDMASKYKEFGFQ-----
-----G
>chicken_Ngb
ME-----SGM-----
LSRTQQALIRESWRRVSGSPVQHGVLFSRLFDLDPDLLPLFYQYNCKFASPQECLAPEFLDHIRKVMLVIDAAVSHLEDLPC
LEFYLCNLGKKH-QAVG-V-KVESFSTVGESLLYMLEKCLGAA-FSP-DVREAWIELYSAVVKAMQRGWEVLPEGD-----
-----
>cloudy_catshark_HbA
-----
MIFTDNDKNEIMPIIKVLEQNAEKLGAESLARMFALYPGSKVYF-HFEDFSA-----AGPKVKKHGAKVIGAITKAAHHLDD-
--LHGHLGLELAETHGKVLL-V-DPQNFPKLCQCIEVTLASHL-TE-FLP-STHCSIDKLLTVICQELSSRYR-----
-----
>cloudy_catshark_HbB
-----MVHWTPEERSEITSTWSAI--
NHKAVGTKALERMFSVYPWTTRYFSTIQGFTA-----EGHAIKVVGALDKAVKHLDD---VKTFKDLKSKKHAEELH-
I-DPGSFHLLTDCFIMELAHLEKCK-FTP-HTHATWAKFFKVVDATSKQYH-----
>cloudy_catshark_Mb
-----
MGDWDNVNVVWAKVEPNITAIGQAILLRFLQEHKETKAHFPKFKDI-AVEQLGNNEDVSKHGTIVLRALGNILKQKGS---
HGANKVELADSHINKHK-I-PPQNFTLITNIAVKVLTEMYPGD-MTG-QMQDSFSKVFKIICTDLENLYKEANFQ-----
-----G
>coelacanth_Cygb
ME-----KVQGEMEMDR-----
WERSDQLSDTEVESIRQIWSNVYTNCENVGVLVLRFFVNFPSAKQYFSQFRHLEDPLDMERSVQLRKHARRVMGAINTVVEN
VED-QDIASVLAPVGKAHALKHK-V-EPVYFKILSGVILEILAEFYAQH-FTP-
EVQKAWTKLMSIICCHVTATYKEVWGQLSNSTM-----
>coelacanth_GbE
-----
MALSDAEVQTARDVWGQIYANAENGTIILVRMFTEHPDTSYFGNFKGMGSAAMEQSAQVRTHGKKIFSAIANDMIQHLDST
DALLGVVNPLGKKHATQLK-V-DPKNFKIIICNILLQVLDEKFGG-----DARAGFEKVTDLCTHLNHAYKEAGW-----
-----
>coelacanth_GbX1
MGCVFSGSGIAPSKSTPDINGSEAESRLSEE-----LKSGSGQNSD-----
ALLLSEPQKELIQESWRILHQDITRLGIIMFIRLFETHPECKDVFFLFRDIDDFHQLKMSKELQAHGLRVMSFIEKSVARLEQ
KDKLEQIAFELGRSH-CRYN-A-PPKYYQYVGQVQFISVVKPILKEA-WTP-EVEEAWQILFKYLTAVMKGYYVEEKINI-
NNALYTKIPNALSSNPVQNNL
>coelacanth_GbX2
MGCAISGLSWRAVK-----GPGE-----AKGKEGEAEA-----
LPAISQLQIHLIQESWKLIQEDIAKVGIIMFVRLFETHPECKDVFFLFRDVDDLQRLRTSKELRAHGLRVMSFVEKSVARLEH
SERLEQLALELGKSH-YRYN-A-PPKYYQYVGIEFVCAVQPILKER-WTP-EVEEAWQTLFKYVTEVMKRGYLQEEKIKRT-
METVEPKQASRRANNAI---
>coelacanth_GbY
-----
MAALTEADKQNIIRGIWKTVFENAEENGRTIVIRLFEEKYPETKVYFKNFKNISTMEEMQKNEQIRIHGLRVMSNLNQVIQNI
LNEVYSILTHLAKRHQYVHR-V-DVHNFKLIFGVIIKILKEALGAT-FTE-EICTSWQKMLSFTYDYLVSCHYKSSGP-----
-----
>coelacanth_HbA1
-----
MLSANDKTLISSTWNKVAANAEDIGAEALERLFLAHPQTKIYFSHM-DLSP-----GSSMLRAHGKKVMGTIEGSIKSIDK--
-LATVLSRLSDMHAYNFM-V-DPVNFKLLSQCILVALATQLMAD-FTP-EAQCAWDKFLALISEILFSKYR-----
-----
>coelacanth_HbA2
-----
MGLTAADKTLIKSIWGVKEKETEAGVEALVRLFKCFPQSKVYFDHFTDLSP-----SSQKLHAHAKVVLGALTKAVNHLDN-
--ITDTLHDISLVHAKLL-V-DPVNFELLGHGLEVALAAHFATD-FTP-EVHLAIDKFLYEVEKALFETYR-----
-----
>coelacanth_HbB1

```

```

-----MVHWTETERATIETVYQKL--
HLDEVGREALTRLFIVYPWTTRYFKSFGDLSSSKAIASNPKVTEHGLKVMNKLTEAIHNLDH---IKDLFHKLSEKHFHELH-
V-DPQNFKLLSKCLIIVLATKLGKQ-LTP-DVQATWEKLLSVVVAALSREYH-----
>coelacanth_HbB2
-----MVTWTAEEKAITSVWSKV--
NPEEVGHEALIRLFIVYPWTQRYFSTFGSLSSSTVIARNFKVQQAHAHVINALTEAIRNIDN---LKASFSDLKSLHFQKLH-
V-DPENFKLLGKTLIIITLSEKLGSE-FSP-QIQAAWEKFMALVIDSLSRQYN-----
>coelacanth_Mb
-----
MALSEAEWGLILKVGKAEPEAASNGKSVLLRMFQEHPTDQHFQPKFKHM-TYQELQSSEELKTHGDTVLSKLGCLLKLKGN-
--HAGDLHPLAQTHATKHK-I-PLHNFEIIESEIIVKILAKEYPGD-FGA-DGQAALKKALSMIIQDMGGMKEFGFK-----
-----G
>coelacanth_Ngb
ME-----KHN-----
FSVRSKELIRESWDRLGKNKLPHGTVMFTRLFELDPDLMHFLFNYNSSFPSQAGCLTSPEFIDHIHKVMMVVDAAVNSLDNLLS
LEDYLINLGKKH-QAAG-V-KMESFQVVGESLLYMLEHGLDSA-FSV-EVRHAWIALYSFVVETMARGWGANGENKLN-----
-----
>elephant_shark_GbY
-----
MTGITEADKENIHFIWEKLYENPEENGKTIVLRMFTDYPETKMYFQHFKNISTLEEMKKSPOIKRHGKIVMSALNKLIANLDN
GEELSLLAKMAERHINVHK-V-DLHNFQIIFNIIIAILEETFGNA-FTP-EIRGTWTKLFGVIYACLESYKDGAFY-----
-----P
>European_brook_lamprey_Cygb
-----
IEALQDIWEKVFKSAEDVGVIILVRLFTGHPASKQYFAMFKDLETANDLKASAKLRWHAGRVMGSLDKAVRSLRNPEKLIQIL
HAVGLSHARQATPV-DVKYYHILGGIIMDVLLLETFKDE-MSP-TARGAWTKLLGT-----
-----
>goldfish_GbX
MGCAISGS-----GLTAR-----APEIRAGEEET-----
PAGLTANHIRLIKESWRLTQEDIAKVGIIIMFVRLFETHPECKDVFFLFRDVEDLERLRTSRELRAHGLRVMSFIEKSVARLDQ
LERLETLALELGKSH-YRYN-A-PPKYGYVGAEFICAVRPILKDR-WTP-ELEEAWKTLFQYVTSIMREGFLEEERNKRS-
NTQTSSRERPDKRSTAI---
>green_spotted_puffer_Cygb1
ME-----RMQRDGEVDH----
VEQPGLTEKEKVMIQDSWAKVFQSCDDAGVAILVRFFVNFPSKQFFKDFKHMEPEEMQQSVQLRKHAHRVMTALNTLVES
LDNSDRVASVLKSVGRAHALKHN-V-DPKYFKILSGVILEVLGEAFTEI-ITA-
EVASAWTKLLANMCCGIAAVYKEAGWTELSSSVE-----
>green_spotted_puffer_GbX
MGCAISSL-----GAKAE-----FGDRSAEEEDAAAA-----
AAAVYPREDQIQMIKDSWKVIRDDIAKVGIIIMFVRLFETHPECKDVFFLFRDVEDLERLRSSRELRAHGLRVMSFIEKSVAR
LDQQDRLEALAVELGKSH-YHYN-A-PPKYYSYVGAEFICAVQPILKER-FTS-
ELEEAWKTLFQYVTGLMRKGHQEESRQR--HLALPPKDGPEKRTSAL---
>green_spotted_puffer_Ngb
ME-----
KLSSKDKELIRGSWDSLGNKVKPHGVILFSRLFELDPDLLNLFHYTTNCGSTQDCLSSPEFLEHVTKVMLVIDAAVSHLDDLH
SLEDFLNLGRKH-QAVG-V-KPQSFAMVGESLLYMLQCSLGQA-YTA-SLRQAWLNMYSVVVASMSRGWAKNGEDKAD----
-----
>gummy_shark_Mb
-----
VDWEKVNVSWSAVESDLTAIGQNILLRLFEQYPESQNHFPKFKNK-SLGELKDTADIKAQADTVLSALGNIVKKKGS---
HSQVPKALAATHITTHK-I-PPHYFTKITTIIVDLSEMYPSE-MNA-QVQAAFSGAFKIIICSDIEKEYKAANFQ-----
-----G
>human_CYGB
ME-----KVPGEIMEIER----
RERSEELSEAERKAVQAMWARLYANCEDVGAVAILVRFFVNFPSAKQYFSQFKHMEEDPLEMERSPQLRKHACRVMGALNTVVEN
LHDPDKVSSVLALVGKAHALKHK-V-EPVYFKILSGVILEVVAEEFASD-FPP-
ETQRAWAKLRGLIYSHVTAAYKEVGWVQVNPATTPPATLPSSG-----P
>human_HBA
-----
MVLSPADKTNVKAAWGKVGAGHAGEYGAEALERMFLSFPTTKTYFPHF-DLSH-----GSAQVKGHGKKVADALTNAVAHVDD-
--MPNALSALSDDLHAHLKLR-V-DPVNFKLLSHCLLVTLAAHLPAE-FTP-AVHASLKDFLASVSTVLTSKYR-----
-----
>human_HBB
-----MVHLTPEEKSAVTALWGKV--
NVDEVGGEALGRLLVVYPWTQRFFESFGDLSTPDAVMGNPKVKAHGKKVLGAFSDGLAHLDN---LKGTFTLSELHCDKLH-
V-DPENFRLLGNVLVCVLAHHFGKE-FTP-PVQAAYQKVVAGVANALAHKYH-----
>human_HBD
-----MVHLTPEEKTAVALWGKV--
NVDVAVGGEALGRLLVVYPWTQRFFESFGDLSSPDAVMGNPKVKAHGKKVLGAFSDGLAHLDN---LKGTFSQLSELHCDKLH-
V-DPENFRLLGNVLVCVLAARNFGKE-FTP-QMQAAYQKVVAGVANALAHKYH-----

```



```

>human_HBE
-----MVHFTAEEKAAVTSLSKSM--
NVEEAGGEALGRLLVVYPWTQRFFDSFGNLSSPSAILGNPKVKAHGKKVLTSLFGDAIKNMDN--LKPFAKLSELHCDKLH-
V-DPENFKLLGNVMVILATHFGKE-FTP-EVQAAWQKLVSAVAIALAHKYH-----
>human_HBG
-----MGHFTTEEDKATITSLWGKV--
NVEDAGGETLGRLLVVYPWTQRFFDSFGNLSSASAIMGNPKVKAHGKKVLTSLGDAIKHLDD--LKGTFACLSELHCDKLH-
V-DPENFKLLGNVLVTVLAIHFGKE-FTP-EVQASWQKMTGVSALSSRYH-----
>human_HBZ
-----
SLTKTERTIIIVSMWAKISTQADTIGTETLERLFLSHPQTKTYFPHF-DLHP----GSAQLRAHGSKVVAAGDAVKSIDD--
-IGGALSKLSELHAYILR-V-DPVNFKLLSHCLLVTLAARFPAD-FTA-EAHAAWDKFLSVVSSVLTEKYR-----
>human_MB
-----
MGLSDGEWQLVLNVWGKVEADIPGHGQEVLIIRLFKGPETLEKFDKFKHLKSEDEMKASEDLKKHGATVLTALGGILKKKGH-
--HEAEIKPLAQSHATKHK-I-PVKYLEFISECIIQVLQSKHPGD-FGA-DAQGAMNKALELFRKDMASNYKELGFQ-----
-----G
>human_NGB
-----
MERPEPELIRQSWRAVSRSPLEHGTVLFARLFALPEDLLPLFYQNCRFSSPEDCLSSPEFLDHIRKVMLVIDAAVTNVEDLSS
LEEYLASLGRKH-RAVG-V-KLSSFSTVGESLLYMLEKCLGPA-FTP-ATRAAWSQLYGAVVQAMSRGWDGE-----
>inshore_hagfish_aHb1
-----PIID----
QGPLPTLTDGDKKAINKIWPKIYKEYEQYSLNILLRFLKCFPPQAQASF PKFSTKKS--
NLEQDPEVKHQAVVIFNKVNEIINSMDNQEEIIKSLKDLQKHKT VFK-V-DSIWFKELSSIFVSTI-----
DGGAEFEKLF SIIICILLRSAY-----
>mallard_GbE
-----
MPFSEAEVQSARGAWEKIYVDAEDNGTAVLVRMFTEHPDTSYFTHFKGMDSAEEMKQSDQVRGHGKRVFTAINDMVQHLDNT
EAFGLILNPLGQKHATQLK-V-DPKNFRIICDIIQLQMEEKFGG-----DCKASFEKVTNEICTHLNNVYKEAGW-----
>medaka_Cygb1
ME-----RKQ--GEVDH----
LERSRPLTDKERVMIQDSWAKVYQNCDDAGVAILVRLFVNFPSSKQYFSQFKHIEDAELEKSSQLRKHARRVMNAINTLVES
LDNSDKVSSVLNAVGAHAIRHK-V-DPVYFKILSGVILEVLGEAYPQV-MTA-
EVASAWTNLLAILCCSIKAVYEELGWPHLSNSTS-----
>medaka_Cygb2
MSCRESPPPPSPPQML-----GVQRGECEDR----
PERAEPLSDAEMEIIQHTWGHVYKNCEDVGVSVLIRFFVNFPSSAKQYFSQFQDMQDPEEMEKSSQLRQHARRVMNAIN-
VVENLQDPEKVSSVLALVGKAHAVKHK-V-EPIYFKILSGVMSVLSEDFPEF-FTA-
EVQLVWTKLMAAVYWHVTGAYTEVGWLQVSSSAV-----
>medaka_HbA
-----
MSLSAKDKAAVKAFWAKVSGQADAIGSDALSRLVVYPQTKTYFAHWKDLSP----GSAPVKKHGKTVMGGIADAVGKIDD-
--ISSGLNLSELHAFTLR-V-DPTNFKILSHNIIIVMAIMFPQD-FTP-EVHVALDKFLAAVSLALSEKYR-----
>medaka_HbB
-----MVEWTEQERSIITNIFGNL--
DYEDVGSKALSRLIVYPWTQRYFASFGLNLYNAEAIKTNPNIAAHGTVLHGLDRAVKNMDN--IKATYAELSVLHSEKLH-
V-DPDNFKLLADCLTIVIAAKLGA-FSP-EIQATFQKFLAVVVSALGRQYH-----
>medaka_Mb
-----
MADYDMVLKHWGPVEADYNTHGNLVLTRLFHEYPTQKLF PKFAGI-AKGD MAGNAALSAHGATVLKKLGELLKARGN---
HGAILKPLANSATKHK-I-PINNFR LITEVIGKVM AEKAGLD--A-AGQQALRSVMAGIIAEIEADYKELGFA-----
-----G
>medaka_Ngb
ME-----
KLSGKDKELIRGSWESLGKNKVPBGVIMFSRLFELDPALLSLFNNTNCGSTQDCLSSPEFLDHVTKVMLVIDAAVNHLDDLH
SLEDFLNLGRKH-QAVG-V-STQSFVAVGESLLYMLQCSLGQA-YTA-ALSQAWLNMYSIVVAAMSRGWAKNGEDKAD----
>mouse_Ngb
-----
MERPESELIRQSWRVSRSPLEHGTVLFARLFALPESSLPLFYQNGRFSSPEDCLSSPEFLDHIRKVMLVIDAAVTNVEDLSS
LEEYLTSLGRKH-RAVG-V-RLSSFSTVGESLLYMLEKCLGPD-FTP-ATRTAWSRLYGAVVQAMSRGWDGE-----
>platypus_GbY
-----
MVQVTDVEKANIQSIWSKMMENLEKNGIDIFTRLFREYPETKKYF---

```

```

KNIPLEGNLQEDPLLRSHGRRVMVALNRRIQNLDNWKQVCKILNPLAEKHKIIHS-V-DVENFQFMLKCVGDVCQDYLGPC-
YTP-EIAESFQKLQSSLYDQVVITYLHSGSD-----
>platypus_HbW
-----MVNWTSEEKHAIVSIWGKV--
DIEETGANALSRLLVYPWTQRYFSAFNLSSPTAIVGNPRVRAHGKVLTSFGEAVKDLDH--VKSNTAKLSQLHSEKLN-
V-DPENFRLGLDNLIIIVLAATLGKD-FTP-EAQAQWQKLVGVVASALSSQYH-----
>platypus_Ngb
ME-----NGR-----
LSGPQEQLIRESWSVNSNPLEHGMLFTRLFDLEPDLLPLFQYNCRFSSPRDCLASPEFLDHIRKVMLVIDAAVIHLDDLSS
LEEYLTNLGRKH-KAIG-V-KLSSFSTVGESLLFMLDKCLGPA-FSP-ATREAWTRLYTAVVHAMSRRGWGGE-----
-----
>po_brook_lamprey_aHbA
-----MPIVD-----
SGSVGAISAAEKSLIVSAWAPVYAKYEEAGVDILVKFFAANPEAQAFPPKFKGLDSADQLKKSPAVRWHAERIINAVNDAVVA
MDDPAKQSLQLKELSQKHAHELN-V-DPKYFKVLAVISDAVVK-----SG-DAKAAVDKLLSQVVILLKSAY-----
-----
>po_brook_lamprey_aHbB
-----MPIVD-----
SGSVPALTAAEKATIRTAWAPVYAKYQSTGVDILIKFFTSTNPAAQEFFPKFKGLTSADQLKKSMQDVRWHAERIINAVNDAVVA
MDDTEKMSLKLNELSSKHAKSFQ-V-DPQYFKVLAAVIVDTVL-----PGDAGLEKLMSMICILLRSSY-----
-----
>po_brook_lamprey_aHbC
-----MPIVD-----
SGSVAPLSAAEKTIRSAWAPVYSNYETSGVDILVKFFTSTPAAQEFFPKFKGMTSADQLKKSDVRWHAERIINAVNDAVAS
MDDTEKMSMKLRDLGKHAHAKSFQ-V-DPQYFKVLAAVIADTVA-----AGDAGFEKLMSMICILLRSAY-----
-----
>Port_jackson_shark_HbA
-----ST-----
STSTSDYSAADRAELAALSKVLAQNAEAFGAELARMFTVYAATKSYFKDYKDFTA-----
AAPSIKAHGAKVVTALAKACDHLDD---LKTHLHKLATFHGSELK-V-DPANFQYLSYCLEVALAVHL-TE-FSP-
ETHCALDKFLTNTVCHELSSRYR-----
>Port_jackson_shark_HbB
-----VHWSEVELHEITTTWKSII--
DKHSLGAKALARMFIVYPWTTRYFGNLKEFTA-----CSYGVKEHAKKVTGALGVAVTHLGD---VKSQFTDLKKHAEELH-
V-DVESFKLLAKCFVVELGILLKDK-FAP-QTQAIWEKYFGVVVDASKEYH-----
>Port_jackson_shark_Mb
-----
MTEWEHVNVKVVAVVEPDIPAVGLAILLRLFKHEKTKDLFPKFKEI-PVQQLGNNEDLRKHGVTVLRLGNILKQKGG---
HSTNVKELADTHINKHK-I-PPKNFVLITNIAVKVLTEMYPST-MTG-PMQESFSKVFTVICSDLETLYKEANFQ-----
-----G
>rat_Cygb
ME-----KVPDMEIER-----
RERNEELSEAERKAVQATWARLYANCEDVGVAIVRFFVNFPSAKQYFSQFKHMDPLEMERSPQLRKHACRVMGALNTVVEN
LHDPDKVSSVLALVGKHAHLKH-K-V-EPMYFKILSGVILDVIAEEFAND-FPV-
ETQKAWTKLRGLIYSHVTAAYKEVGVVQVQVNTTTLPATLPSSG-----P
>river_lamprey_aHb
-----MPIVD-----
SGSVAPLSAAEKTIRSAWAPVYSNYETSGVDILVKFFTSTPAAQEFFPKFKGMTSADQLKKSDVRWHAERIINAVNDAVAS
MDDTEKMSMKLRDLGKHAHAKSFQ-V-DPQYFKVLAAVIADTVA-----AGDAGFEKLMSMICILLRSAY-----
-----
>sea_lamprey_aHb_ps1
-----MPIVD-----SGSVAPLN-----
MSTPEVSYFNYATSGVDILVKFFTSTPAVQEFFPKFKGMTSADQLKKSDVR-
HAERIINAVNDAVTSMDDEKISMKLRDLGKHTISF--V-DPQYFKVLAAVIADTVA-----
AGDAGFEKLMSMICILLRSAY-----
>sea_lamprey_aHb_ps2
-----MPIVD-----SGSVAPLR-----
MSTPEVSYFNYATSGVDILVKFFTSTPAVQEFFPKFKGMTSADQLKKSDVR-
HAERIINAVNDAVTSMDDEKISMKLRDLGKHAISF--V-DPSTSRFLAAVIADTVA-----
AGDAGFEKLMSMICILLRSAY-----
>sea_lamprey_aHb1
-----MPIVD-----
SGSVPALTAAEKATIRTAWAPVYAKYQSTGVDILIKFFTSTNPAAQAFPPKFKGLTSADQLKKSMQDVRWHAERIINAVNDAVVA
MDDTEKMSLKLRELSGKHAHAKSFQ-V-DPQYFKVLAAVIVDTVL-----PGDAGLEKLMSMICILLRSSY-----
-----
>sea_lamprey_aHb10
-----MPIVD-----
SGSVGALSASEKAAVAGSWKAVYANYEAAGKAVLIKFFTSTNPGVQDFPPKFKGLDSADKLSKSPAVRWHAERIINAVNDSVVA
LDDPEKQSLKLKALSQKHAYEFH-V-DSQYFKVLSATILEQVDDANG-G-LSA-EGKSGWEKLLSSICIHLSAY-----
-----

```

```

>sea_lamprey_aHb11
-----MPIVD-----
SGSAGALSAAEKAIITDSWKVVYADYEAAGKAILIKFFTSNPGVQDFFPKFKGLDSADQLSKSAAVRWHAERIINAVNDAVVA
LDDPEKQSLKALKALSKKHAQEFN-V-DPQYFKVLSANVLEQVAAANG-G-LSA-EAQGAWEKLLSIISILLKSQY-----
-----
>sea_lamprey_aHb12
-----MPIVD-----
SGSVGEFSAAEKSLIVSAWAPVYAKYEEAGVDILVKFFSDNPGVQDFFPKFKGLDSADQLKKSPAVRWHAERIINAVNDAVVA
LDDPPKLSLKLKALKALSKKHAQELN-V-DPQYFKVLAVISDAVAK-----SG-DEKAAVDKFLSQVVILLKFAY-----
-----
>sea_lamprey_aHb13
-----MPIVD-----
SGSVGAISAAEKSLIVSAWAPVYAKYEEAGVDILVKFFAANPEAQAFFPKFKGLDSADQLKKSPAVRWHAERIINAVNDAVVA
LDDPAKQSLQLKALSQKHAHELN-V-DPSYFKVLAVISDAVAK-----SG-DAKAAVDKFLSQVVILLKSAY-----
-----
>sea_lamprey_aHb14
-----MPIVD-----
SGSVGAISAAEKSLIVSAWAPVYAKYEEAGVDILVKFFAANPEAQAFFPKFKGLDSADQLKKSPAVRWHAERIINAVNDAVVA
LDDPAKQSLQLKALSQKHAHELN-V-DPSYFKVLAVISDAVAK-----SG-DAKAAVDKFLSQVVILLKSAY-----
-----
>sea_lamprey_aHb2a
-----MPIVD-----
TGSVAPLSAAEKTKIRSAWAPVYSNYETSGVDILVKFFTSTPAAQEFFPKFKGLTTADQLKKSADVRWHAERIINAVNDAVVS
MDDTEKMSMKLRDLSGKHAKSFQ-V-DPQYFKVLA AVIADTVA-----AGDAGFEKLMSMICILLRSAY-----
-----
>sea_lamprey_aHb3
-----MPIVD-----
TGSVAPLSAAEKTKIRSAWAPVYSNYETTGV DILVKFFTSTPAAQEFFPKFKGLTTADQLKKSADVRWHAERIINAVNDAVVS
MDDTEKMSMKLGDLSGKHAKSFQ-V-DPQYFKVLA AVIADTVA-----AGDAGFEKLMSMICILLRSAY-----
-----
>sea_lamprey_aHb5a
-----MPIVD-----
TGSVAPLSAAEKTKIRSAWAPVYSTYETSGVDILVKFFTSTPAAQEFFPKFKGLTTADQLKKSADVRWHAERIINAVNDAVAS
MDDTEKMSMKLRDLSGKHAKSFQ-V-DPQYFKVLA AVIADTVA-----AGDAGFEKLMSMICILLRSAY-----
-----
>sea_lamprey_aHb5b
-----MPIVD-----
TGSVAPLSAAEKTKIRSAWAPVYSTYETSGVDILVKFFTSTPAAQEFFPKFKGLTTADQLKKSADVRWHAERIINAVNDAVAS
MDDTEKMSMKLRDLSGKHAKSFQ-V-DPQYFKVLA AVIADTVA-----AGDAGFEKLMSMICILLRSAY-----
-----
>sea_lamprey_aHb6
M-----GALQD-----
SGIVSSFKEDEKAALRESWDIFNNSHQDAGVKILARFIINNPEAKKFFPKFKGLNTAEELQNSAEVRIHGDKILA AVQQAVLD
LDDDPKQKNKLDLSKSHAQEFN-V-EPAYFKTFAEVILKYVTETCGKS-FTS-EMRTSWSKLLSLIIIELQSAY-----
-----
>sea_lamprey_aHb7
-----MPIED-----
TGSKPDFSDEEKKAIKDSWSGVYSEYESASSEILIKFFVDNPSAQDFFPKFKGLDSEEKLNSTAVRWHAERIINAVNDVIWL
LDEPEKNAKNLKESEKHAVQLN-V-DAKFFKVLAEILDKVAEKSGDS-FSD-SARSAWEKLLTYICISLKVAY-----
-----
>sea_lamprey_aHb8
-----MPIVD-----
TGSVAPLSAAEKTKIRSAWAPVYSNYETSGVDILVKFFTSTPAAQEFFPKFKGMTTADQLKKSADVRWHAERIINAVNDAVTS
MDDTEKMSMKLRDLSGKHAKSFQ-V-DPQYFKVLA AVIADTVA-----AGDAGFEKLMSMICILLRSAY-----
-----
>sea_lamprey_aHb9
-----MPIVD-----
SGSVGALSGAEKAAIADSWKAVYSNYEEAGKAILIKFFTSNPGVQDFFPKFKGLDSADQLSKSAAVRWHAERIINAVNDAVVA
LDDPEKLSLKLKALKALSKKHAQEFN-V-DPQYFKVLAVNIVEGVSSANG-G-LGA-EAQAAWEKFLSQVSILLKSQY-----
-----
>sea_lamprey_aMb1
-----MSIAD-----
SGSAPALSGDEKSAVRDRTWKVVYPHAEDHGTTILIKFLTENADAKKFFPKFKQALKTADEMKSSPVLRDHAKRIMNSINDMVVA
LDDTNAQNAQMNGLSKKHANDFK-V-DPKYFKVISNVILSVIAEGLGAQ-FND-AAKNGWSKLLTTTCIGLKSFAF-----
-----
>sea_lamprey_aMb2
M-----SAIVD-----
SGSAPALSGDEKAAIKSTWPSVFAKAEDVGAEMLSRFISSNADVKKYFPKFKDISSQAEKSSAKVRDHAKRIMAFINDLVDN
IDNAGAQTAKLHLSAEHA EKFK-V-DPQYFKVISNVLLDILGETFGAS-FSG-ATRS AWIKLLSIICIGLRSFAF-----
-----

```



```

>sea_lamprey_Cygb
ME-----
QGWLSEEEIEALQDIWEKVFKSAEDVGVILLVRLFTGHPASKQYFPMFKDLETADDLKASAKLRWHAGRVMGSLDKAVRSLRK
PEELIKILRAVGLSHARKATPV-DVKYYHILGGIIMDVLLETF KDE-LSP-
TARSAWTKLLGTLCTEFENAYREEGVLEQAAA-----
>sea_lamprey_GbX1
MGCTVSTDERTGAQSS-----SQGQSQASRK-----QQQPEQQRAA-
GEGHQPPGPPQAPSESQRRLLVRDSWLALQCDIARVGVIMFVRLFETHPECKDVFYQFRDCEDLQKLKMNKQLQAHGLRVMSFI
EKSVARLEQECVLEQLIVEMGRKH-YKYN-A-SPKYYSFVGIEFIATVQPFLEK-WTN-
EVEDAWQCLFRYIAAVMKRGYLEEEAASNGVNTANYDRGQGNHGATAM----
>sperm_whale_Mb
-----
VLSEGEWQLVLHVWAKVEADVAGHGQDILIRLFKSHPETLEKFD RFKHLKTEAEMKASEDLKKHGVTVL TALGAILKKKGH--
-HEABLKPLAQSHATKHK-I-PIKYLEFISEAIIHVLHSRHPGD-FGA-DAQGAMNKALELFRKDIAAKYKELGYQ-----
-----G
>spiny_dogfish_HbA
-----
VLSAADKTAIKHLTGSRLRTNAEAWGAESLARMFATPSTKTYFSKFTDFSA-----NGKRVKAHGGKVLNAVADATDHLDN--
-VAGHLDPLAVLHGTTLC-V-DPHNFP LLTQCILVTLAAHL-TE-LKP-ETHCALDKFLCEVATALGSHYR-----
-----
>spiny_dogfish_HbB
-----VHWTGEEKALVNAVWTKT--
DHQAVVAKALERLFFVYPWTKTYFVKFNGFHA-----SDSTVQTHAGKVVSALTVAYNHIDD--VKPHFVELSKKHYYELH-
V-DPENFKLLANCLEVELGHALHKE-FTP-EVQAAWSKFSNNVV DALSKGYH-----
>spotless_smooth-hound_HbA
-----
MAFTACEKQTIGKIAQVLAKSPEAYGAELARLFVTHPGSKSYF-EYKDYS-----AGAKVQVHGGKVIRAVVKA AEHVDD-
--LHSHLET LALTHGKKLL-V-DPQNFPMLSECIIVTLATHL-TE-FSP-DTHCAVDKLLSAICQELSSRYR-----
-----
>spotless_smooth-hound_HbB
-----MVHWTQEERDEISKTFQGT--
DMKTVVTQALDRMFKVYPWTNRYFQKRTDFRS-----SIHAGIVVGALQDAVKHMDD--VKTLFKDLSKKHADDLH-
V-DPGSFHLLTDCIIVELAYLRKDC-FTP-HIQGIWDKFFEVIDAISKQYH-----
>tope_shark_Mb
-----
ADWDKVN SVWSAMEANITAVGQNILLRLFEQYPESQSYFPKLNK-SLGELKDTADIKAQADTVL KALGNIVKKKGN---
HSQPVKALAAATHITTHK-I-PPHYFTKITTIAVGVLSEMYPSE-MNA-QAQEAFSGAFKSICSDIEKEYKAANFQ-----
-----G
>torafugu_Cygb1
ME-----RMQGDGELDH----
VERPSPLTDKEKVMIQDSWAVVFQSCDDAGVAILVRLFVSFPSSKQLFKDFKDIEEPEEMQRSIQLRKHAHRVMTTINTLVEN
LDDADAMASALKSVGRAHALRHK-V-DPKYFKILSGVILEVLGEAFTEI-ITA-
EVASAWTKLLANMCCAVAAVYEEAGWTKLSSSAE-----
>torafugu_Cygb2
MSHRESPPAPPPPPQLL-----GGQRRDVEGEDG----
PERAKPLSDTEREMIQDTWGHYIKNCEDVGVSVLIRFFVNFP SAKRYFSQFQDMEDPEEMERSSQLRHHACRVMNAINTVVEN
LHDPEKVSSVLALVGKAHA IKHK-V-EPMYFKILCGVMLEVLCEAFPEF-FTA-
DVRMVWAKLMAAVYWHVTGAYTDVGWLQVSSSAV-----
>torafugu_Ngb
ME-----
KLSSKDKE LIRGSWDSL GKNKVP HGVIMFSRLFELDP ELLSLFHYTTNCGSTQDCLSSPEFLEHVTKVMLVIDAAVSHLDDLH
SLED FLLNLGRKH-QAVG-V-NPQSFATVGESLLYMLQC SLGQA-YTA-SLRQAWLNMYSVVVAAMSRGWAKNGEDKAD----
-----
>turkey_GbE
-----
MSFSEAEVQSARGAWEKIYVDAEDNGTAVLIRMFTEHPDTSYFTHFKGMDSAEEMKQSDQVRGHGKRVFTAINDMVQHLDNT
EAFLGILNPLGQKHATQLK-I-DPKNFRIICDII LQMEEKFGG-----DCKTSFEKVTNEICTHLTNIYKEAGW-----
-----
>western_clawed_frog_Cygb
ME-----KVQGENDMER----
WERLEEITESERGVIKETWARVYANCEDVGVSILIRFFVNFP SAKQHFSQFKHME DPLEMEGSVQLRKHARRVMGAVNSVVEN
LGDPEKITTVLSIVGKSHALKHK-V-DPVYFKILTGVMLEVIAEEYAKD-FTP-
DVQLAWNKL RSHLYSHVLSAYKEAGWTQYPSNSV-----
>western_clawed_frog_GbX
MGCILSSLGWQW-----RDSL DHTETSP-----
LLPTLNLSEQQQQLLVESWRLIQHDI AKVG VILFVRLFETHPECKDVFFLFRDVDDLQALRANKDLRAHGLRVLSFVEKSVAR
IADCARLEELALELGRSH-YRYN-A-PPRYYQYVGTEFISAVCPMLHDK-WTA-
EVEEAWKGLFAYICTVMERGYQEEERRHSD-GRSL---IDGLQGNKGLI---
>western_clawed_frog_GbY

```

```

-----
MADLTGADIENINEVWSKIYANPEESGRVTVISLFLTYPQTKIYFKNLKNISTLQEMQDNAGIRAHGKRVMGALNHVIENLKD
WDAVCSALSHLAKRHQDVHK-V-EVNNFELLFLVIISVFKEALGSG-FTP-EQSKSWEKLFSTITYKYLESCYANTDS-----
-----
>western_clawed_frog_HbA1
-----
MHLTADDKKHIKAIWPSVAAHGDKYGGREALHRMFMCAPKTKTYFPDF-DFSE-----HSKHILAHGKKVSDALNEACNHLDN-
--IAGCLSKLSDLHAYDLR-V-DPGNFPLLAHQIILVVVAIHFPKQ-FDP-ATHKALDKFLVSVSNVLTSKYR-----
-----
>western_clawed_frog_HbB1
-----MVNLTAKERQLITGTWSKI--
CAKTLGKQALGSMLYTYPWTQRYFSSFGNLSSIEAIFHNAAVATHGEKVLTSIGEAIKHMDD---IKGYAQLSKYHSETLH-
V-DPENFKRRCSCCTIISMAQTLQED-FTP-ELQAAFEKLFAAIADALGKGYH-----
>western_clawed_frog_HbB2
-----MVHWTAEKATIASVWGKV--
DIEQDGHDAISRLLVVYPWTQRYFSSFGNLSSNVSAVSGNVKVKAHGNKVL SAVGSAIQHLDD--VKSHLKGLSKSHAEDLH-
V-DPENFKRLADVLVIVLAALKLSA-FTP-QVQAVWEKLNATLVAALSHGYF-----
>western_clawed_frog_Ngb
ME-----KDQ-----
LSGPQKELIRESWQTSQDQLHHGTVLFSRLFELEPELVFLFQYNSSFSKVQDCLSSAEFTEHIRKVMTVIDA AVSSLDCLSS
LDEYLTSLGRKH-RAVG-V-KLESFNTVGESLLFALESCLGDA-FTS-DTREAWSLLYANVVQSMRSGWHRDSQEQR-----
-----GI-----
>zebrafinch_Cygb
ME-----KVQGE MEIER----
WERSEEISDAEKKVIEIWSRVYANCEDVGVSILIRFFVNFPSAKQYFSQFKHMDPLEMERSLQLRKHARRVMGAINTVVEN
LNDSEKVS SVLALVGKAHALKHK-V-EPIYFKKLTGVMLEVI AEEYPND-FTP-
EAHGAWTKMKT LIYTHVTAAYKEVGWAQYPTATL-----
>zebrafinch_GbE
-----
MSLSAEVQSARGAWEKIYVDAEDNGTAVLVRMFTEHPDTSYFPHFKGMDSAEMKQSDQVRGHGKKVFGAINDMVQHLDNS
EAF LGIVTPLGKKHATQLK-I-DPKNFRIICDIILQLMEEFKG-----DCKASF EKVTNEICTHLNNIYKEEGW-----
-----
>zebrafinch_HbA
-----
MVLSAGDKSNVKAVFGKIGGQADEYGADALERM FATYPQTKTYFPHF-DLGK-----GSAQVKGHGKKVAAALVEAANNVDD-
--LAGALSKLSDLHAQKLR-V-DPVNFKLLGQCFVLVVATRNP SL-LTP-EVHASLDKFLCAVGTVLTAKYR-----
-----
>zebrafinch_HbAD
-----
MLTGEDKKLLQQTWGLKGGAEEVGDALWRMFHSYPTTKTYFPHF-DMSQ-----GSDQVRGHGKKVMAALSNVKNLDN--
--LSQALSEL SNLHAYNLR-V-DPVNFKFLSQCLQVTLATRLGKE-YSP-EVHASVDKFMSAVASVLAEKYR-----
-----
>zebrafinch_HbE
-----MVNWTAEKQLVTTLWGRV--
NVDECGAEALARLLVAYPWTQRFVVSFGNMSSPTAVLGNPMVRAHGKKVLT SFGEAVRNMDS---VKKCFAQLSKLHCEK LH-
V-DPENFRLLGDVLVVVLASHFGKE-FTP-ACQA AWQKLVRVVAHALAHEYH-----
>zebrafinch_Mb
-----
MGLSDQEWQQVLT VWGKVESDLAGHGHQILMRLFQDHPETLDRFEKFKGLKTPDAMKGSEDLKKHGVTVLTQLGKILKAKGN-
--HEAELKPLAQTHATKHK-I-PVKYLEFISEV IIKVLAEKHAAD-FGA-DAQAAMKKALELFRNDMATKYKEFGFQ-----
-----G-----
>zebrafinch_Ngb
ME-----SGM-----
RLSGGQRALIRESWQRVSGSPVQHGLVLFTRLFDLDPDLLPLFQYNCKFASPHECLSAPEFLDHIRKVMLVIDAAVSHLENLS
CLEEYLCNLGKKH-QAVG-V-KVESFSTVGESLLYMREEKPGAA-FSP-EVQGGWSKLYNAVVKAMQRGWETLPEGD-----
-----
>zebrafish_Cygb1
ME-----GDGGVQL----
TQSPDSLTEEDVCVIQDTWKPVYAERDNAGVAVLVRF FTNFPSAKQYFEHFRELQDPAEMQQNAQLKKHGQRVLNALNTLVEN
LRDADKLNTIFNQMGKSHALRHK-V-DPVYFKILAGVILEVLVEAFPQC-
FSPA EVQSSWSKLMGILYWQMN RVYAEV GWENSKK-----
>zebrafish_Cygb2
ME-----KEREDEETEG----
RERPEPLTDVERGIKDTWARVYASCEDVGVTILIRFFVNFPSAKQYFSQFQDMEDPEEMEKSSQLRKHARRVMNAINTVVEN
LHDPEKVSSVLVLVGKAHAFKYK-V-EPIYFKILSGVILEILAE EFGE-FTP-
EVQTSWSKLMAALYWHITGAYTEVGWVKLSSAV-----
>zebrafish_GbX
MGCAISGS-----GLTAG-----APEIRPGEEET-----
PAGLTTNHIRLIKESWRLIQEDIAKVGIMFVRLFETHPECKDVFFLFRDVEDLERLRTSRELRAHGLRVMSFIEKSVARLDQ

```

```

LERLETLALELGKSH-YRYN-A-PPKYYGYVGAEFICAVRPILKDR-WTP-ELEEAWKTLFQYVTSIMREGFLEEERNKRS-
NTQTSSRRERPDKRSTAI----
>zebrafish_HbAa
-----
MSLSDTDKAVVKAIWAKISPKADEIGAEALARMLTVYPQTKTYFSHWADLSP-----GSGPVKKHGKTIMGAVGEAISKIDD-
--LVGGLAALSELHAFKLR-V-DPANFKILSHNVIVVIAMLFAD-FTP-EVHVSVDKFFNNLALALSEKYR-----
-----
>zebrafish_HbAe
-----
MSLSAKDKAAVKTLWAKIAGKADDIGHDALSRMLIVYPQTKTYFSHWADLSP-----GSAPVRKHGKTVMGGVAEAVSKIDD-
--LNAGLLNLSELHAFQLR-V-DPANFKILSHNIIVLATLFPAD-FTP-EAHVAMDKFLSALALAMSEKYR-----
-----
>zebrafish_HbAx
-----
MPSSAEKELIAEIWDQMPVAEEIGSEALLRMFTTFPQTKTYFSLH-NISA-----NSEHLRSHGKKIVEALAEGAKNVST--
-LTTTLAPLSRFHAYQLR-I-HPTNFKLFNHCILVTLACRMGDD-FTP-VVHAAIDKFLSAFSAVLAЕКFR-----
-----
>zebrafish_HbBa
-----
NIDEIGPQALSRCCLIVYPWTQRYFATFGNLSSPAAIMGNPKVAAHGRTVMGGLERAIGNMDN--VKNTYAALSVMHSEKLNH-
V-DPDNFRLLADCLITVCAAMKFGQAGFNA-DVQEAQKFLAVVVSALCRQYH-----
>zebrafish_HbBe
-----
DYDVIGPQALARCLIVYPWTQRYFAKFGNLYNAAAILGNPMVAAHGKTVLKGLELAVKNMDN--IKATYADLSVLHSEKLNH-
V-DPDNFRLLADCLITIVVAAQMGAG-FTP-EVQAAFQKFI AVAVSALGRQYH-----
>zebrafish_Mb
-----
MADHDLVLKCGAVEADYAANGGEVLNRLFKEYPDTLKLFPKFSGI-SQGDLAGSPAVAAHGATVLKKLGELLKAKGD---
HAALLKPLANTHANIHK-V-ALNNFRLITEVLVKVMAEKAGLD--A-AGQALRRVMDAVIDIGIGYKEIGFA-----
-----G
>zebrafish_Ngb
ME-----
KLSEKDKGLIRDSWESLGKNKVPHGIVLFTRLFELDPALLTLFSYSTNCGDAPECLSSPEFLEHVTKVMLVIDAAVSHLDDLH
TLEDFLLNLGRKH-QAVG-V-NTQSFALVGESLLYMLQSSLGPA-YTT-SLRQAWLTMYSIVVSAMTRGWAKNGEHKSN----
-----

```

**Supplementary Figure S2.** Amino acid alignment of the 136 globin sequences used in phylogenetic analyses, as generated by MAFFT L-INS-i. The alignment is also available as text file (supplementary file 1, Supplementary Material online).

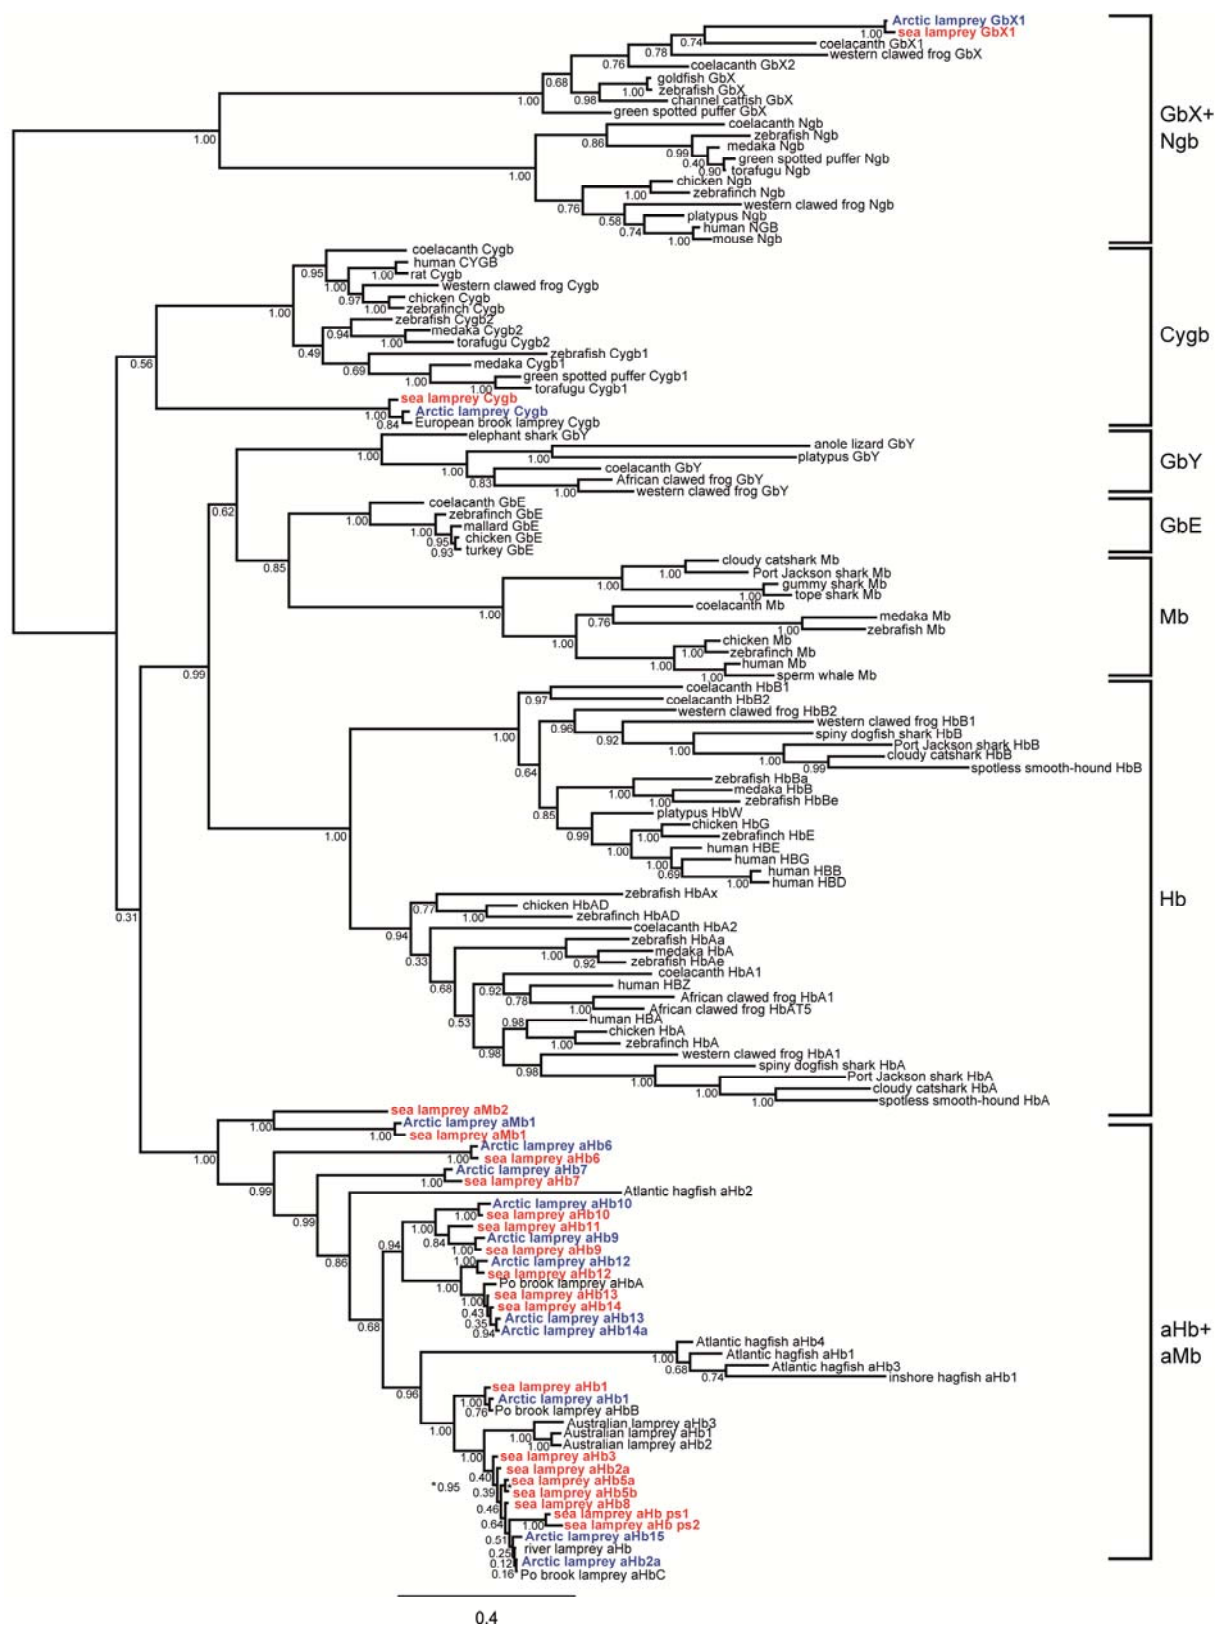

**Supplementary Figure S3.** Full Bayesian phylogenetic tree without collapsed branches. Posterior probabilities at each node are indicated.

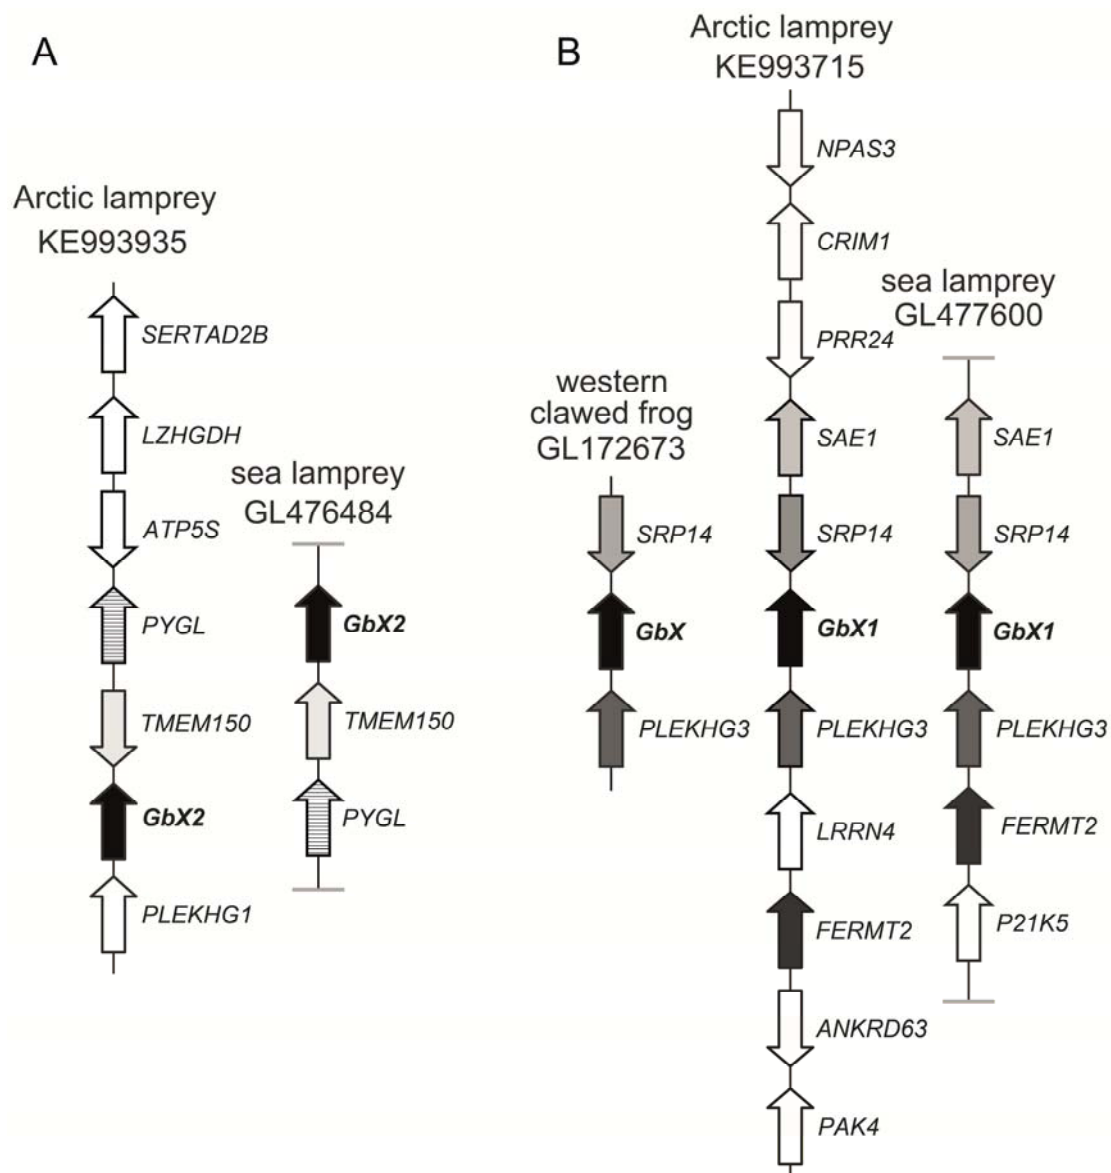

**Supplementary Figure S4.** Conserved synteny in the *GbX* region. The neighboring genes of the lampreys *GbX1* (B) and the *GbX2* (A) are indicated. Comparison with the western clawed frog *GbX* cluster shows the conserved synteny with the sea lamprey *GbX1*. The globin genes are colored in black, orthologous genes are indicated in the same shades of grey.

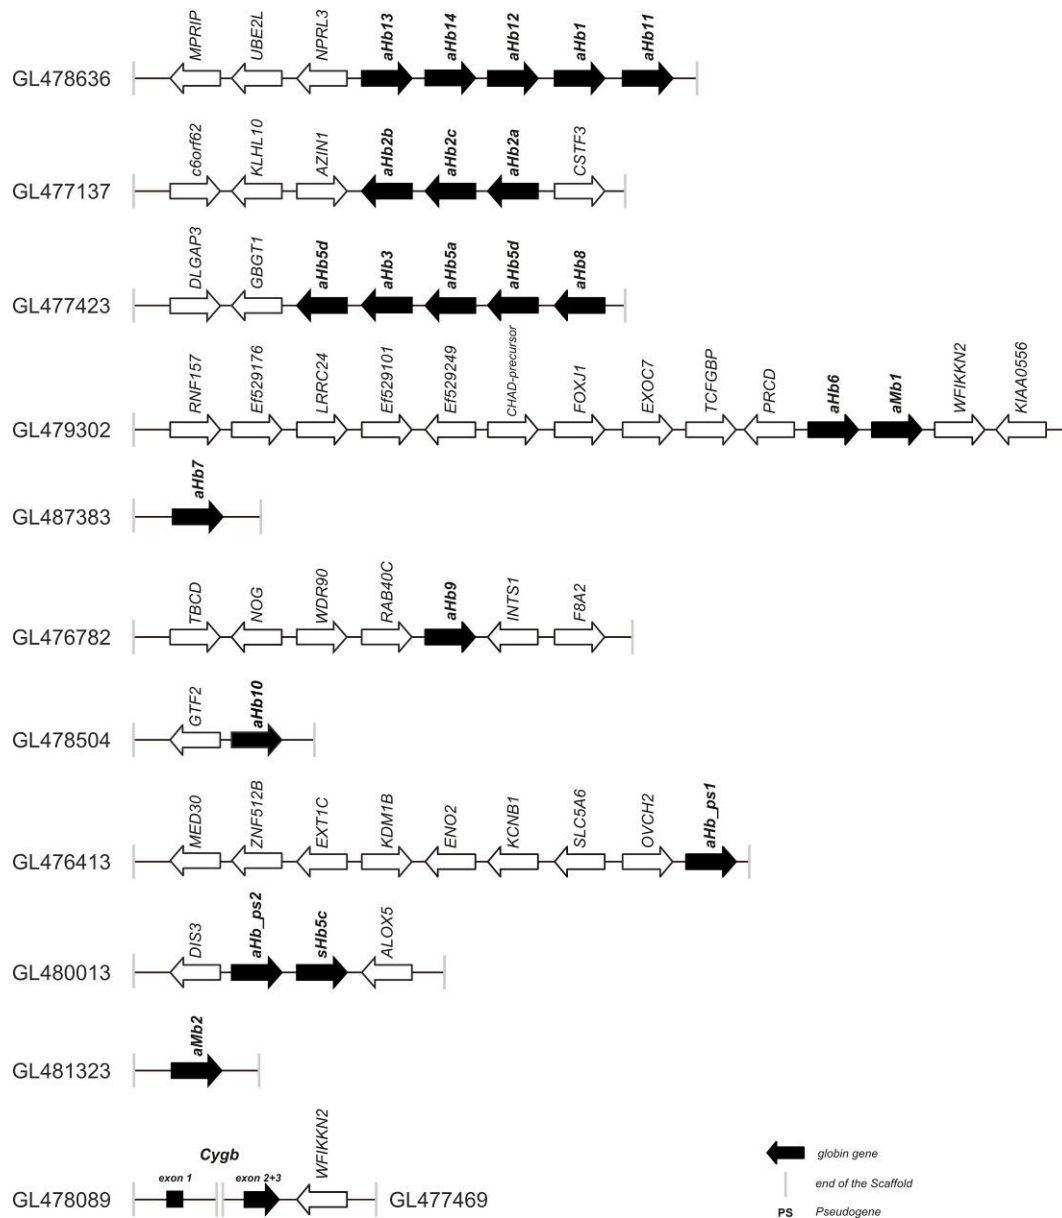

**Supplementary Figure S5.** The sea lamprey hemoglobin gene clusters. The neighboring genes of globin genes are indicated. The globin genes are colored in black.

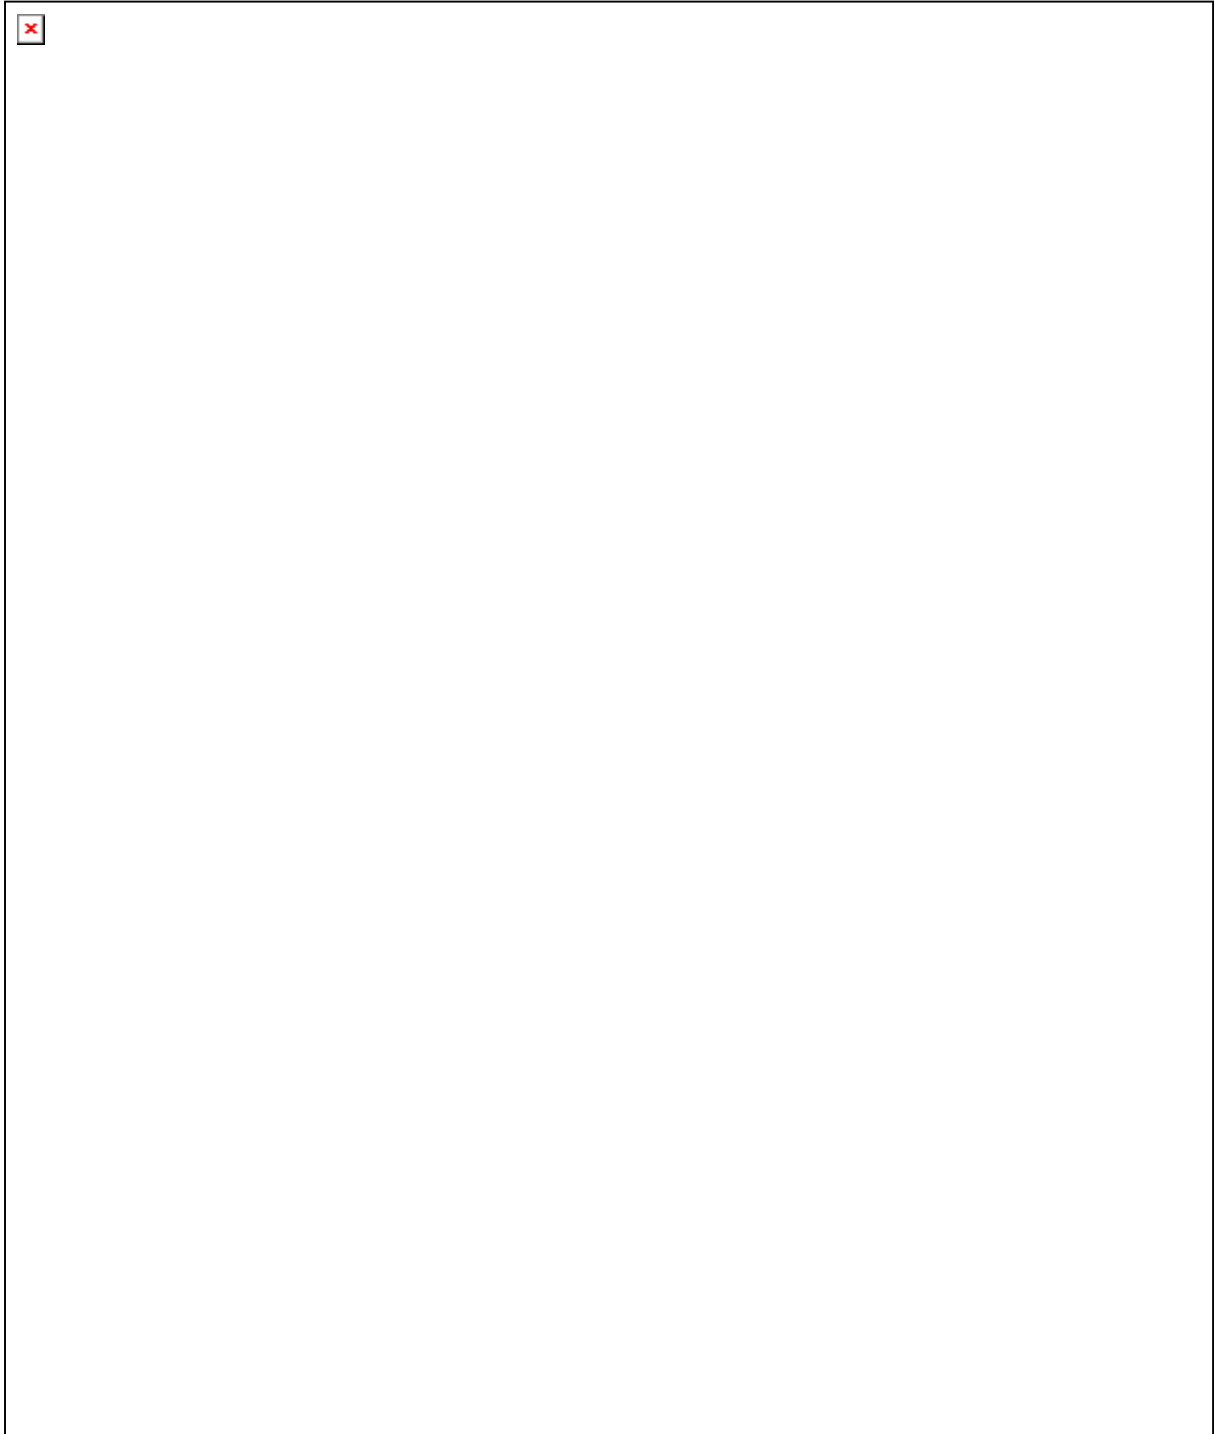

**Supplementary Figure S6.** The Arctic lamprey hemoglobin gene clusters. The neighboring genes of globin genes are indicated. The globin genes are colored in black.



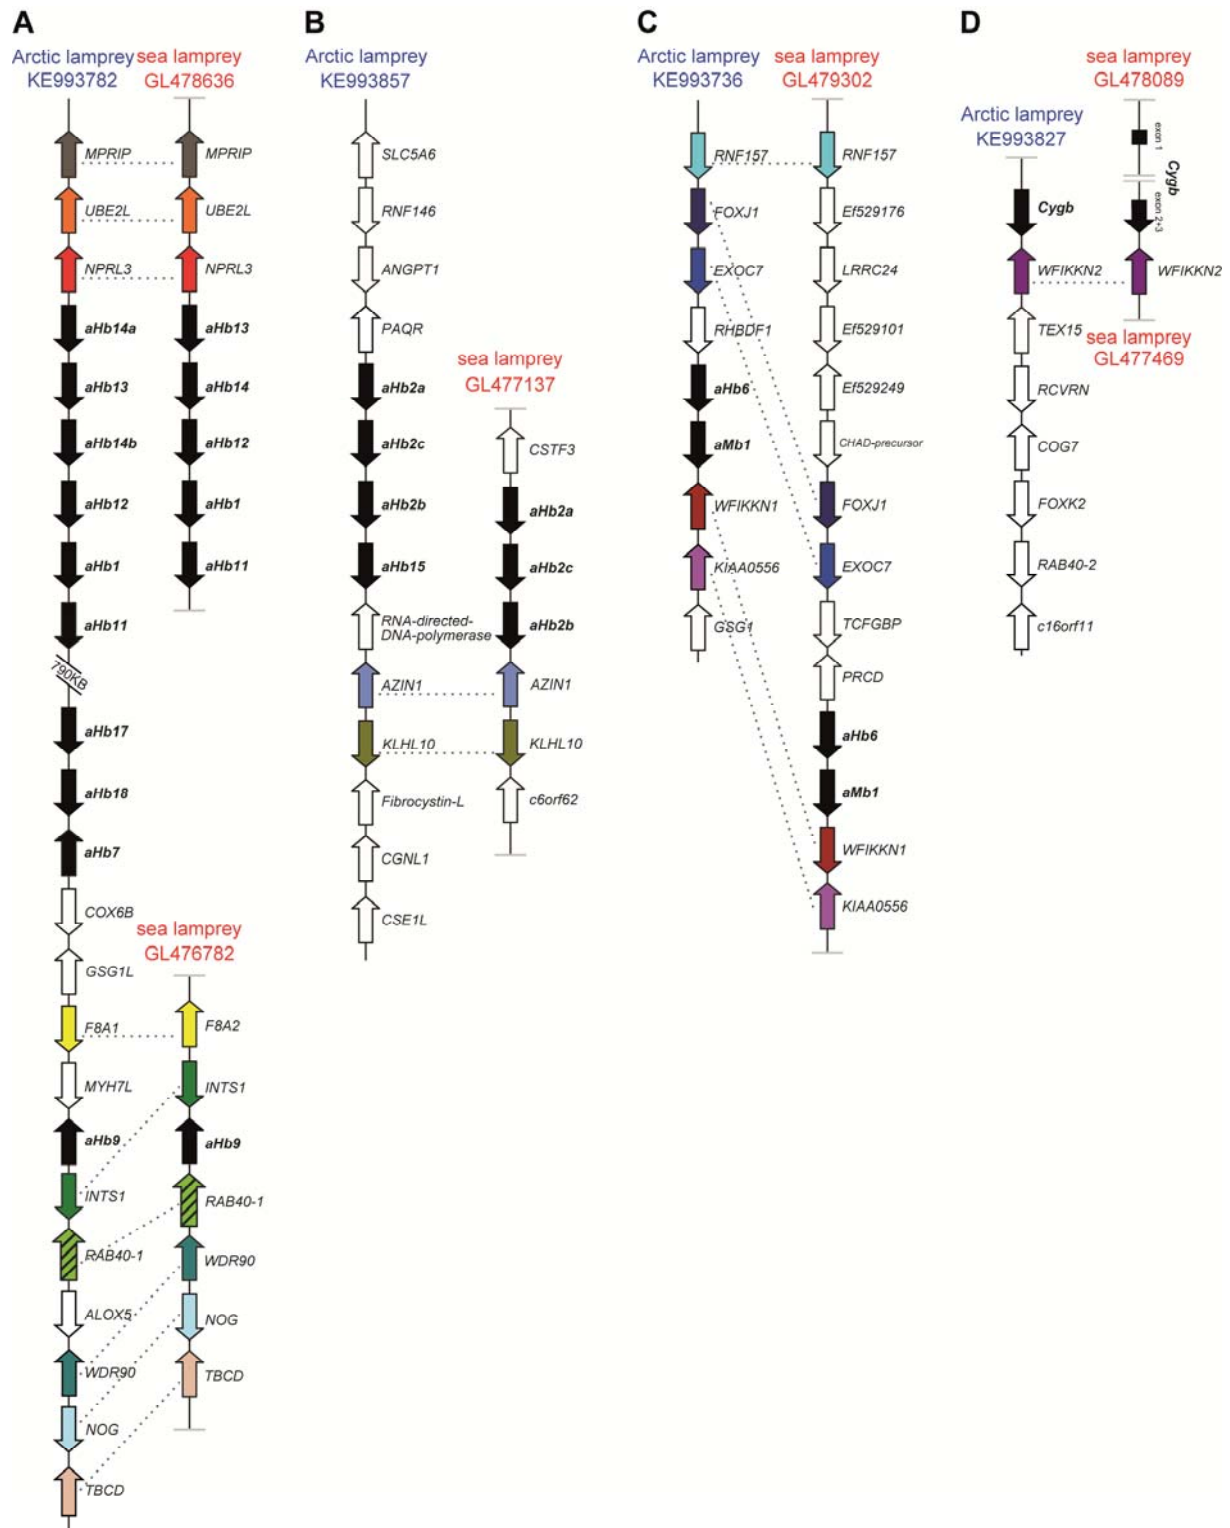

**Supplementary Figure S7.** Synteny analyses of the globin loci of the sea lamprey and the Arctic lamprey. Note that in (A) scaffold KE993782 of the Arctic lamprey links the sea lamprey scaffolds GL478636 and GL476782.
