# Supplementary material for: The Globin Gene Repertoire of Lampreys: Convergent Evolution of Hemoglobin and Myoglobin in Jawed and Jawless Vertebrates
Source: Oxford University Press journal article supplement (doi:10.1093/molbev/msu216), 2014-07-23
Supplement: msu216_Supplementary_Data.zip [file msu216_Supplementary_Data.zip]

## Supplementary Tables

**Supplementary Table S1.** Globin genes of the sea lamprey.

| Label   | Accession number                               | Protein    | Length (aa)<br>/Exons | Genomic location               |
|---------|------------------------------------------------|------------|-----------------------|--------------------------------|
| aHb1    | ENSPMAG000000001587<br>not correctly annotated | P09967     | 150/3                 | GL478636: 78661-80200          |
| aHb2a   | AF248645,<br>ENSPMAG000000007266               | Q9I9I3     | 150/3                 | GL477137: 47523-49311          |
| aHb2b   | ENSPMAG000000007259<br>not correctly annotated | -          | 150/3                 | GL477137: 38017-40815          |
| aHb2c   | ENSPMAG000000007276                            | -          | 150/3                 | GL477137: 58445-59886          |
| aHb3    | ENSPMAG000000005328                            | P09968     | 150/3                 | GL477423: 86128-87616          |
| aHb5a   | ENSPMAG000000005354                            | P02208     | 150/3                 | GL477423: 91643-92884          |
| aHb5c   | not annotated                                  |            | 32/1                  | GL480013 (incomplete sequence) |
| aHb5d   | ENSPMAG000000005317                            | -          | 150/3                 | GL477423: 74276-75516          |
| aHb5d   | ENSPMAG000000005354                            | -          | 150/3                 | GL477423: 100329-101615        |
| aHb6    | EG333697                                       | -          | 160/3                 | GL479302: 428488-432549        |
| aHb7    | EE278870                                       | -          | 159/3                 | GL487383 (incomplete sequence) |
| aHb8    | ENSPMAG000000005367                            | -          | 160/3                 | GL477423: 113786-116619        |
| aHb9    | ENSPMAG000000008540                            | -          | 158/3                 | GL476782: 336771-345936        |
| aHb10   | FD718926                                       | -          | 158/3                 | GL478504 (incomplete sequence) |
| aHb11   | ENSPMAG000000001592                            | -          | 158/3                 | GL478636: 89680-93262          |
| aHb12   | ENSPMAG000000001587<br>not correctly annotated | -          | 153/3                 | GL478636: 74790-76680          |
| aHb13   | ENSPMAG000000001587<br>not correctly annotated | -          | 153/3                 | GL478636: 64058-65463          |
| aHb14   | ENSPMAG000000001587<br>not correctly annotated | -          | 153/3                 | GL478636: 70655-71833          |
| aHb_ps1 | not annotated                                  | pseudogene | 141/3                 | GL476413: 739046-740131        |
| aHb_ps2 | not annotated                                  | pseudogene | 141/3                 | GL480013: 24143-25251          |
| aMb1    | ENSPMAG000000006056                            | -          | 159/3                 | GL479302: 463339-464603        |
| aMb2    | EG021442,                                      | -          | 160/3                 | GL481323 (incomplete           |

|      |                                                |   |       |                                |
|------|------------------------------------------------|---|-------|--------------------------------|
|      | ENSPMAG000000008310                            |   |       | sequence)                      |
| Cygb | ENSPMAG000000008260                            | - | 165/3 | GL478089 + GL477469            |
| GbX1 | ENSPMAG000000007241<br>not correctly annotated | - | 222/5 | GL476484: 69158-91992          |
| GbX2 | not annotated                                  | - | 107/3 | GL477600 (incomplete sequence) |

**Supplementary Table S2.** Globin genes of the Arctic lamprey.

| Label  | Accession number | Length (aa)/Exons | Genomic location                                |
|--------|------------------|-------------------|-------------------------------------------------|
| aHb1   | AB294236         | 150/3             | KE993782: 445415-446993 (incomplete sequence)   |
| aHb2a  |                  | 150/3             | KE993857: 605702-606905                         |
| aHb2b  |                  | 150/3             | KE993857: 621222-621454                         |
| aHb2c  | AB294235         | 150/3             | KE993857: 614558-615759                         |
| aHb2d  |                  | 150/3             | APJL01123255                                    |
| aHb6   |                  | 160/3             | KE993736: 1240304-1244535                       |
| aHb7   | AB294237         | 159/3             | KE993782: 1263324-1256951 (incomplete sequence) |
| aHb9   |                  | 153/3             | KE993782: 1379925-1377460                       |
| aHb10  |                  | 158/3             | KE994284: 13389-15769                           |
| aHb11  |                  | 118/2             | KE993782: 452740-453920                         |
| aHb12  |                  | 153/3             | KE993782: 440736-441724,<br>APJL01129493        |
| aHb13  |                  | 153/3             | KE993782: 429820-431012                         |
| aHb14a |                  | 153/3             | KE993782: 424111-425256                         |
| aHb14b |                  | 153/3             | KE993782: 436262-437408                         |
| aHb15  |                  | 150/3             | KE993857: 627462-629103                         |
| aHb16  |                  | 42/1              | APJL01106671                                    |
| aHb17  |                  | 68/1              | KE993782: 1244627-1244829                       |
| aHb18  |                  | 119/2             | KE993782: 1244595-1245720                       |
| aMb1   |                  | 159/3             | KE993736: 1270853-1271922                       |
| aMb2   |                  | 78/1              | APJL01135086                                    |
| Cygb   |                  | 165/3             | KE993827: 80981-106171                          |
| GbX1   |                  | 183/5             | KE993715: 897573-875415                         |
| GbX2   |                  | 107/3             | KE993935: 608940-                               |

|  |  |  |        |
|--|--|--|--------|
|  |  |  | 620621 |
|--|--|--|--------|

**Supplementary Table S3.** List of globin sequences used for phylogenetic analyses (fig. 2 and Supplementary fig. 3). EMBL/GenBank/ENSEMBL accession numbers of nucleotides are given. Asterisks denote protein accession numbers.

| <b>Globin</b> | <b>Label</b>             | <b>Species</b>                   | <b>Common name</b>   | <b>Accession number</b> |
|---------------|--------------------------|----------------------------------|----------------------|-------------------------|
| GbX           | goldfish GbX             | <i>Carassius auratus</i>         | goldfish             | AJ635195                |
| GbX           | zebrafish GbX            | <i>Danio rerio</i>               | zebrafish            | AJ635194                |
| GbX           | catfish GbX              | <i>Ictalurus punctatus</i>       | channel catfish      | CK416201                |
| GbX           | coelacanth GbX1          | <i>Latimeria chalumnae</i>       | coelacanth           | ENSLACG000000010727     |
| GbX           | coelacanth GbX2          | <i>Latimeria chalumnae</i>       | coelacanth           | ENSLACG000000003954     |
| GbX           | sea lamprey GbX1         | <i>Petromyzon marinus</i>        | sea lamprey          | ENSPMAG000000007241     |
| GbX           | Arctic lamprey GbX1      | <i>Lethenteron camtschaticum</i> | Arctic lamprey       | genome                  |
| GbX           | green spotted puffer GbX | <i>Tetraodon nigroviridis</i>    | green spotted puffer | AJ635193                |
| GbX           | western clawed frog GbX  | <i>Xenopus tropicalis</i>        | western clawed frog  | NM_001011196            |
| Ngb           | zebrafish Ngb            | <i>Danio rerio</i>               | zebrafish            | BC059416                |
| Ngb           | chicken Ngb              | <i>Gallus gallus</i>             | chicken              | NM_001031551            |
| Ngb           | human NGB                | <i>Homo sapiens</i>              | man                  | AB463927                |
| Ngb           | coelacanth Ngb           | <i>Latimeria chalumnae</i>       | coelacanth           | genome                  |
| Ngb           | mouse Ngb                | <i>Mus musculus</i>              | mouse                | AJ245945                |
| Ngb           | platypus Ngb             | <i>Ornithorhynchus anatinus</i>  | platypus             | XM_001508367            |
| Ngb           | medaka Ngb               | <i>Oryzias latipes</i>           | medaka               | DK002855                |
| Ngb           | zebra finch Ngb          | <i>Taeniopygia guttata</i>       | zebra finch          | ENSTGUG000000012286     |
| Ngb           | green spotted puffer Ngb | <i>Tetraodon nigroviridis</i>    | green spotted puffer | AJ315609                |
| Ngb           | torafugu Ngb             | <i>Takifugu rubripes</i>         | torafugu             | XM_003962460            |
| Ngb           | western clawed frog Ngb  | <i>Xenopus tropicalis</i>        | western clawed frog  | NM_001030351            |
| aHb           | inshore hagfish aHb1     | <i>Eptatretus burgeri</i>        | inshore hagfish      | Q7SID0*                 |
| aHb           | river lamprey aHb        | <i>Lampetra fluviatilis</i>      | river lamprey        | P02207*                 |
| aHb           | Arctic lamprey aHb1      | <i>Lethenteron camtschaticum</i> | Arctic lamprey       | AB294236                |
| aHb           | Arctic lamprey aHb2a     | <i>Lethenteron camtschaticum</i> | Arctic lamprey       | genome data             |
| aHb           | Arctic lamprey aHb6      | <i>Lethenteron camtschaticum</i> | Arctic lamprey       | genome data             |
| aHb           | Arctic lamprey aHb7      | <i>Lethenteron camtschaticum</i> | Arctic lamprey       | AB294237                |
| aHb           | Arctic lamprey aHb9      | <i>Lethenteron camtschaticum</i> | Arctic lamprey       | genome data             |
| aHb           | Arctic lamprey           | <i>Lethenteron</i>               | Arctic lamprey       | genome data             |

|     |                            |                                      |                    |                     |
|-----|----------------------------|--------------------------------------|--------------------|---------------------|
|     | aHb10                      | <i>camtschaticum</i>                 |                    |                     |
| aHb | Arctic lamprey<br>aHb12    | <i>Lethenteron<br/>camtschaticum</i> | Arctic lamprey     | genome data         |
| aHb | Arctic lamprey<br>aHb13    | <i>Lethenteron<br/>camtschaticum</i> | Arctic lamprey     | genome data         |
| aHb | Arctic lamprey<br>aHb14a   | <i>Lethenteron<br/>camtschaticum</i> | Arctic lamprey     | genome data         |
| aHb | Arctic lamprey<br>aHb15    | <i>Lethenteron<br/>camtschaticum</i> | Arctic lamprey     | genome data         |
| aHb | Po brook<br>lamprey aHbA   | <i>Lethenteron zanandreaei</i>       | Po brook lamprey   | Z24746              |
| aHb | Po brook<br>lamprey aHbB   | <i>Lethenteron zanandreaei</i>       | Po brook lamprey   | Z24747              |
| aHb | Po brook<br>lamprey aHbC   | <i>Lethenteron zanandreaei</i>       | Po brook lamprey   | Z24748              |
| aHb | Australian<br>lamprey aHb1 | <i>Mordacia mordax</i>               | Australian lamprey | P21197*             |
| aHb | Australian<br>lamprey aHb2 | <i>Mordacia mordax</i>               | Australian lamprey | P21198*             |
| aHb | Australian<br>lamprey aHb3 | <i>Mordacia mordax</i>               | Australian lamprey | P21199*             |
| aHb | Atlantic hagfish<br>aHb1   | <i>Myxine glutinosa</i>              | Atlantic hagfish   | AF184239            |
| aHb | Atlantic hagfish<br>aHb2   | <i>Myxine glutinosa</i>              | Atlantic hagfish   | AF157494            |
| aHb | Atlantic hagfish<br>aHb3   | <i>Myxine glutinosa</i>              | Atlantic hagfish   | AF184047            |
| aHb | Atlantic hagfish<br>aHb4   | <i>Myxine glutinosa</i>              | Atlantic hagfish   | AF156936            |
| aHb | sea lamprey<br>aHb1        | <i>Petromyzon marinus</i>            | sea lamprey        | P09967*             |
| aHb | sea lamprey<br>aHb2a       | <i>Petromyzon marinus</i>            | sea lamprey        | Q9I9I3*             |
| aHb | sea lamprey<br>aHb3        | <i>Petromyzon marinus</i>            | sea lamprey        | P09968*             |
| aHb | sea lamprey<br>aHb5a       | <i>Petromyzon marinus</i>            | sea lamprey        | P02208*             |
| aHb | sea lamprey<br>aHb5b       | <i>Petromyzon marinus</i>            | sea lamprey        | ENSPMAG000000005354 |
| aHb | sea lamprey<br>aHb6        | <i>Petromyzon marinus</i>            | sea lamprey        | EG333697            |
| aHb | sea lamprey<br>aHb7        | <i>Petromyzon marinus</i>            | sea lamprey        | EE278870            |
| aHb | sea lamprey<br>aHb8        | <i>Petromyzon marinus</i>            | sea lamprey        | ENSPMAG000000005367 |
| aHb | sea lamprey<br>aHb9        | <i>Petromyzon marinus</i>            | sea lamprey        | ENSPMAG000000008540 |
| aHb | sea lamprey<br>aHb10       | <i>Petromyzon marinus</i>            | sea lamprey        | FD718926            |

|      |                                |                                      |                           |                                |
|------|--------------------------------|--------------------------------------|---------------------------|--------------------------------|
| aHb  | sea lamprey<br>aHb11           | <i>Petromyzon marinus</i>            | sea lamprey               | ENSPMAG000000001592            |
| aHb  | sea lamprey<br>aHb12           | <i>Petromyzon marinus</i>            | sea lamprey               | Scaffold GL477423              |
| aHb  | sea lamprey<br>aHb13           | <i>Petromyzon marinus</i>            | sea lamprey               | Scaffold GL477423              |
| aHb  | sea lamprey<br>aHb14           | <i>Petromyzon marinus</i>            | sea lamprey               | Scaffold GL477423              |
| aHb  | sea lamprey<br>aHb1 ps         | <i>Petromyzon marinus</i>            | sea lamprey               | Scaffold GL476413              |
| aHb  | sea lamprey<br>aHb2 ps         | <i>Petromyzon marinus</i>            | sea lamprey               | Scaffold GL480013              |
| aMb  | Arctic lamprey<br>aMb1         | <i>Lethenteron<br/>camtschaticum</i> | Arctic lamprey            | genome data                    |
| aMb  | sea lamprey<br>aMb1            | <i>Petromyzon marinus</i>            | sea lamprey               | ENSPMAG000000006056            |
| aMb  | sea lamprey<br>aMb2            | <i>Petromyzon marinus</i>            | sea lamprey               | EG021442                       |
| Cygb | zebrafish Cygb1                | <i>Danio rerio</i>                   | zebrafish                 | BC165894                       |
| Cygb | zebrafish Cygb2                | <i>Danio rerio</i>                   | zebrafish                 | AJ635229                       |
| Cygb | chicken Cygb                   | <i>Gallus gallus</i>                 | chicken                   | NM_001008789                   |
| Cygb | human CYGB                     | <i>Homo sapiens</i>                  | man                       | AJ315162                       |
| Cygb | European brook<br>lamprey Cygb | <i>Lampetra planeri</i>              | European brook<br>lamprey | TBA                            |
| Cygb | coelacanth Cygb                | <i>Latimeria chalumnae</i>           | coelacanth                | ENSLACG000000014904            |
| Cygb | Arctic lamprey<br>Cygb         | <i>Lethenteron<br/>camtschaticum</i> | Arctic lamprey            | genome data                    |
| Cygb | medaka Cygb1                   | <i>Oryzias latipes</i>               | medaka                    | NM_001104767                   |
| Cygb | medaka Cygb2                   | <i>Oryzias latipes</i>               | medaka                    | NM_001104768                   |
| Cygb | sea lamprey<br>Cygb            | <i>Petromyzon marinus</i>            | sea lamprey               | Scaffold GL478089+<br>GL477469 |
| Cygb | rat Cygb                       | <i>Rattus norvegicus</i>             | rat                       | NM_130744                      |
| Cygb | zebra finch Cygb               | <i>Taeniopygia guttata</i>           | zebra finch               | XM_002195407                   |
| Cygb | green spotted<br>puffer Cygb1  | <i>Tetraodon nigroviridis</i>        | green spotted puffer      | AJ635230                       |
| Cygb | torafugu Cygb1                 | <i>Takifugu rubripes</i>             | torafugu                  | ENSTRUG000000012110            |
| Cygb | torafugu Cygb2                 | <i>Takifugu rubripes</i>             | torafugu                  | ENSTRUG000000008030            |
| Cygb | western clawed<br>frog Cygb    | <i>Xenopus tropicalis</i>            | western clawed frog       | NM_001006869                   |
| GbY  | anole lizard GbY               | <i>Anolis carolinensis</i>           | anole lizard              | ENSACAG000000027586            |
| GbY  | elephant shark<br>GbY          | <i>Callorhynchus milii</i>           | elephant shark            | JK861558                       |
| GbY  | coelacanth GbY                 | <i>Latimeria chalumnae</i>           | coelacanth                | XM_005990799                   |
| GbY  | platypus GbY                   | <i>Ornithorhynchus<br/>anatinus</i>  | platypus                  | AC203513                       |
| GbY  | African clawed<br>frog GbY     | <i>Xenopus laevis</i>                | African clawed frog       | NM_001095686                   |

|     |                           |                                    |                       |                     |
|-----|---------------------------|------------------------------------|-----------------------|---------------------|
| GbY | western clawed frog GbY   | <i>Xenopus tropicalis</i>          | western clawed frog   | XM_002941194        |
| GbE | mallard GbE               | <i>Anas platyrhynchos</i>          | mallard               | genome data         |
| GbE | chicken GbE               | <i>Gallus gallus</i>               | chicken               | NM_001008786        |
| GbE | coelacanth GbE            | <i>Latimeria chalumnae</i>         | coelacanth            | ENSLACG000000001661 |
| GbE | turkey GbE                | <i>Meleagris gallopavo</i>         | turkey                | XM_003202331        |
| GbE | zebra finch GbE           | <i>Taeniopygia guttata</i>         | zebra finch           | XM_002196350        |
| Mb  | zebrafish Mb              | <i>Danio rerio</i>                 | zebrafish             | AY337025            |
| Mb  | tope shark Mb             | <i>Galeorhinus galeus</i>          | tope shark            | P14397*             |
| Mb  | chicken Mb                | <i>Gallus gallus</i>               | chicken               | XM_003202347        |
| Mb  | Port Jackson shark Mb     | <i>Heterodontus portusjacksoni</i> | Port Jackson shark    | P02206*             |
| Mb  | human MB                  | <i>Homo sapiens</i>                | man                   | NM_203377           |
| Mb  | coelacanth Mb             | <i>Latimeria chalumnae</i>         | coelacanth            | ENSLACG000000007526 |
| Mb  | gummy shark Mb            | <i>Mustelus antarcticus</i>        | gummy shark           | P14399*             |
| Mb  | medaka Mb                 | <i>Oryzias latipes</i>             | medaka                | BJ883657            |
| Mb  | sperm whale Mb            | <i>Physeter catodon</i>            | sperm whale           | AB271144            |
| Mb  | zebra finch Mb            | <i>Taeniopygia guttata</i>         | zebra finch           | XM_002199380        |
| Mb  | cloudy catshark Mb        | <i>Scyliorhinus torazame</i>       | cloudy catshark       | FY417124            |
| HbA | zebrafish HbAa            | <i>Danio rerio</i>                 | zebrafish             | BC164447            |
| HbA | zebrafish HbAe            | <i>Danio rerio</i>                 | zebrafish             | AY325264            |
| HbA | zebrafish HbAx            | <i>Danio rerio</i>                 | zebrafish             | AL915033            |
| HbA | chicken HbA               | <i>Gallus gallus</i>               | chicken               | NM_001004376        |
| HbA | chicken HbAD              | <i>Gallus gallus</i>               | chicken               | XM_003643192        |
| HbA | human HbA                 | <i>Homo sapiens</i>                | man                   | AF105974            |
| HbA | human HBZ                 | <i>Homo sapiens</i>                | man                   | M24173              |
| HbA | coelacanth HbA1           | <i>Latimeria chalumnae</i>         | coelacanth            | ENSLACG000000006283 |
| HbA | coelacanth HbA2           | <i>Latimeria chalumnae</i>         | coelacanth            | P23740*             |
| HbA | spotless smooth-hound HbA | <i>Mustelus griseus</i>            | spotless smooth-hound | Q9YGW2*             |
| HbA | medaka HbA                | <i>Oryzias latipes</i>             | medaka                | BAC20295*           |
| HbA | Port Jackson shark HbA    | <i>Heterodontus portusjacksoni</i> | Port Jackson shark    | P02021*             |
| HbA | spiny dogfish HbA         | <i>Squalus acanthias</i>           | spiny dogfish         | P07408*             |
| HbA | cloudy catshark HbA       | <i>Scyliorhinus torazame</i>       | cloudy catshark       | FY415186            |
| HbA | zebra finch HbA           | <i>Taeniopygia guttata</i>         | zebra finch           | DQ216719            |
| HbA | zebra finch HbAD          | <i>Taeniopygia guttata</i>         | zebra finch           | DQ213486            |
| HbA | African clawed frog HbA1  | <i>Xenopus laevis</i>              | African clawed frog   | X02796              |
| HbA | African clawed frog HbAT5 | <i>Xenopus laevis</i>              | African clawed frog   | X02798              |



|     |                               |                                        |                           |              |
|-----|-------------------------------|----------------------------------------|---------------------------|--------------|
| HbA | western clawed<br>frog HbA1   | <i>Xenopus tropicalis</i>              | western clawed frog       | BC088005     |
| HbB | zebrafish HbBa                | <i>Danio rerio</i>                     | zebrafish                 | BC164283     |
| HbB | zebrafish HbBe                | <i>Danio rerio</i>                     | zebrafish                 | NM_198073    |
| HbB | chicken HbG                   | <i>Gallus gallus</i>                   | chicken                   | M73995       |
| HbB | human HBB                     | <i>Homo sapiens</i>                    | man                       | NM_000518    |
| HbB | human HBD                     | <i>Homo sapiens</i>                    | man                       | NM_000519    |
| HbB | human HBE                     | <i>Homo sapiens</i>                    | man                       | NM_005330    |
| HbB | human HBG                     | <i>Homo sapiens</i>                    | man                       | BC130457     |
| HbB | coelacanth HbB1               | <i>Latimeria chalumnae</i>             | coelacanth                | P23741*      |
| HbB | coelacanth HbB2               | <i>Latimeria chalumnae</i>             | coelacanth                | XM_006011048 |
| HbB | spotless smooth-<br>hound HbB | <i>Mustelus griseus</i>                | spotless smooth-<br>hound | Q9YGW1*      |
| HbB | platypus HbW                  | <i>Ornithorhynchus<br/>anatinus</i>    | platypus                  | AC203513     |
| HbB | medaka HbB                    | <i>Oryzias latipes</i>                 | medaka                    | AB080120     |
| HbB | Port Jackson<br>shark HbB     | <i>Heterodontus<br/>portusjacksoni</i> | Port Jackson shark        | P02143*      |
| HbB | spiny dogfish<br>HbB          | <i>Squalus acanthias</i>               | spiny dogfish             | P07409*      |
| HbB | cloudy catshark<br>HbB        | <i>Scyliorhinus torazame</i>           | cloudy catshark           | FY415474     |
| HbB | zebra finch HbE               | <i>Taeniopygia guttata</i>             | zebra finch               | NM_001245112 |
| HbB | western clawed<br>frog HbB1   | <i>Xenopus tropicalis</i>              | western clawed frog       | NM_203528    |
| HbB | western clawed<br>frog HbB2   | <i>Xenopus tropicalis</i>              | western clawed frog       | NM_001016495 |

**Supplementary Table S4.** Stage-specific expression pattern of sea lamprey globins. GenBank Biosample Identifiers are given.

| Lamprey globin | Deveploment stage         | Biosample Identifier                            |
|----------------|---------------------------|-------------------------------------------------|
| aHb1           | Adult                     | LIBEST_018802                                   |
| aHb2           | Adult                     | LIBEST_018802                                   |
| aHb3           | Adult                     | LIBEST_018802                                   |
| aHb5a          | Adult                     | LIBEST_018802                                   |
| aHb5b          | Adult                     | LIBEST_018802                                   |
| aHb6           | Fertilized egg            | LIBEST_019205                                   |
| aHb7           | Fertilized egg<br>Larvae  | LIBEST_019205<br>LIBEST_016049                  |
| aHb8           | Fertilized egg            | LIBEST_019205                                   |
| aHb9           | Embryo<br>Larvae          | LIBEST_022613<br>LIBEST_016049                  |
| aHb10          | Embryo                    | LIBEST_022613                                   |
| aHb11          | Embryo<br>Larvae          | LIBEST_022613<br>LIBEST_016049                  |
| aHb12          | Fertilized egg<br>Larvae  | LIBEST_019205<br>LIBEST_016049                  |
| aHb13          | Embryo<br>Larvae<br>Adult | LIBEST_022613<br>LIBEST_016049<br>LIBEST_018804 |
| aHb14          | Embryo<br>Larvae<br>Adult | LIBEST_022613<br>LIBEST_016049<br>LIBEST_018804 |
| aMb1           | Fertilized egg<br>Adult   | LIBEST_019205<br>LIBEST_019151                  |
| aMb2           | Adult, muscle tissue      | LIBEST_018803                                   |
| Cygb           | Embryo                    | LIBEST_022613                                   |

**Supplementary Table S5.** Oligonucleotides used for RT-PCR and qPCR

| Gene       |               | 5'3' sequence               |
|------------|---------------|-----------------------------|
| Myoglobin1 | aMb1_for      | ATGAGCATTGCAGACAGC          |
|            | aMb1_rev      | GAATGCAGATTTCAAGCCAATGC     |
|            | aMb1_qPCR_for | CCACGCAGAGGACCACGGAACC      |
|            | aMb1_qPCR_rev | CAGCGCCTGGAACTTGGGGAAG      |
| Myoglobin2 | aMb2_for      | ATGAGTGCCATCGTGGAC          |
|            | aMb2_rev      | GCCTAGAAAGCCGAGCG           |
|            | aMb2_qPCR_for | GCCAAGCTGCACTCGCTGAGC       |
|            | aMb2_qPCR_rev | GTCTCGCCCAGGATGTGAGC        |
| Cytoglobin | Cygb_for      | ATGGAGCAGGGCTGGCTGT         |
|            | Cygb_rev      | CTAGGCCGCTGCTTGCTCC         |
|            | Cygb_qPCR_for | CGTCAAGTACTACCACATCTTGGGCGG |
|            | Cygb_qPCR_rev | AGGGTGCCCAGCAGCTTCGTC       |
| Globin 5   | aHb5_for      | ATGCCTATCGTTGACACTGGA       |
|            | aHb5_rev      | TTAGTAGGCGGACCTGAGC         |
|            | aHb5_qPCR_for | CCGGTGTGGACATCCTGGTGAAGTTCT |
|            | aHb5_qPCR_rev | ACGTCCGCGGATTTCTTGAGCTGA    |
